# Supplementary material for: Identification of Glioblastoma Phosphotyrosine-Containing Proteins with Two-Dimensional Western Blotting and Tandem Mass Spectrometry
Source: PubMed Central journal article supplement (PMC4450212; doi:10.1155/2015/134050), 2015-05-18

**Supplemental Table 1. Proteins without tyrosine phosphorylated motif, identified with 2DGE-based Western blotting and MS/MS**

| Spot number     | Swiss-Prot No. | Protein name                                             | Molecular weight | pI   | Mascot score | Number of matched unique peptides | Predicted Tyr-Phospho-motif |
|-----------------|----------------|----------------------------------------------------------|------------------|------|--------------|-----------------------------------|-----------------------------|
| 3, 4, 6, 13, 23 | P02768         | Serum albumin                                            | 71317            | 5.92 | 1321         | 15                                | No                          |
| 12              | P08670         | Vimentin                                                 | 53676            | 5.06 | 725          | 7                                 | No                          |
| 12              | Q13885         | Tubulin beta-2A chain                                    | 50274            | 4.78 | 119          | 3                                 | No                          |
| 12              | Q13509         | Tubulin beta-3 chain                                     | 50856            | 4.83 | 119          | 3                                 | No                          |
| 12              | Q9H853         | Putative tubulin-like protein alpha-4B                   | 27819            | 7.71 | 45           | 1                                 | No                          |
| 27, 33          | P12277         | Creatine kinase B-type                                   | 42902            | 5.34 | 730          | 7                                 | No                          |
| 37              | P09936         | Ubiquitin carboxyl-terminal hydrolase isozyme L1         | 25151            | 5.33 | 76           | 3                                 | No                          |
| 40              | P13693         | Translationally-controlled tumor protein                 | 19697            | 4.84 | 44           | 1                                 | No                          |
| 44, 47          | A8MPP1         | Putative ATP-dependent RNA helicase DDX11-like protein 8 | 102944           | 7.28 | 47           | 1                                 | No                          |
| 47              | P00915         | Carbonic anhydrase 1                                     | 28909            | 6.59 | 113          | 2                                 | No                          |
| 48, 49, 50      | P01834         | Ig kappa chain C region                                  | 11773            | 5.58 | 163          | 3                                 | No                          |
| 51              | P04179         | Superoxide dismutase [Mn], mitochondrial                 | 24878            | 8.35 | 136          | 2                                 | No                          |

**Supplemental Table 2. Phosphotyrosine-containing proteins identified in a human glioblastoma tissue for IPA analysis.**

| ID     | Gene name     | Protein name                                                 | Subcellular location | Function | Drugs                                                                                                                                                                                                                                                                                                                                                                                                                                                                                                          |
|--------|---------------|--------------------------------------------------------------|----------------------|----------|----------------------------------------------------------------------------------------------------------------------------------------------------------------------------------------------------------------------------------------------------------------------------------------------------------------------------------------------------------------------------------------------------------------------------------------------------------------------------------------------------------------|
| P07900 | HSP90AA1      | Heat shock protein 90kDa alpha (cytosolic), class A member 1 | Cytoplasm            | Enzyme   | Alvespimycin, retaspimycin, luminespib, cisplatin                                                                                                                                                                                                                                                                                                                                                                                                                                                              |
| P08238 | HSP90AB1      | Heat shock protein 90kDa alpha (cytosolic), class B member 1 | Cytoplasm            | Enzyme   | Alvespimycin, retaspimycin, cisplatin                                                                                                                                                                                                                                                                                                                                                                                                                                                                          |
| Q12931 | TRAP1         | TNF receptor-associated protein 1                            | Cytoplasm            | Enzyme   |                                                                                                                                                                                                                                                                                                                                                                                                                                                                                                                |
| HSPA1A | HSPA1A/HSPA1B | Heat shock 70kDa protein 1A                                  | Cytoplasm            | Other    |                                                                                                                                                                                                                                                                                                                                                                                                                                                                                                                |
| Q71U36 | TUBA1A        | Tubulin, alpha 1a                                            | Cytoplasm            | Other    | Epothilone B, colchicine/probenecid, larotaxel, eribulin, davunetide, vintafolide, milataxel, cevipabulin, gemcitabine/paclitaxel, docetaxel/prednisone, cyclophosphamide/prednisone/vincristine, docetaxel/hydrocortisone, cyclophosphamide/docetaxel, gemcitabine/vinorelbine, cyclophosphamide/daunorubicin/imatinib/prednisone/vincristine, cyclophosphamide/topotecan/vincristine, docetaxel/gemcitabine, docetaxel/gemcitabine/vincristine, irinotecan/vincristine, irinotecan/temozolomide/vincristine, |

---

|        |        |                   |           |       |                                                                                                                                                                                                                                                                                                                                                                                                                                                                                                                                                                                                                                                                                                                                                                                                                                                                                               |
|--------|--------|-------------------|-----------|-------|-----------------------------------------------------------------------------------------------------------------------------------------------------------------------------------------------------------------------------------------------------------------------------------------------------------------------------------------------------------------------------------------------------------------------------------------------------------------------------------------------------------------------------------------------------------------------------------------------------------------------------------------------------------------------------------------------------------------------------------------------------------------------------------------------------------------------------------------------------------------------------------------------|
|        |        |                   |           |       | bevacizumab/paclitaxel,<br>cyclophosphamide/docetaxel/epirubicin/5-fluorouracil<br>/trastuzumab, docetaxel/trastuzumab,<br>trastuzumab/vinorelbine,<br>gemcitabine/oxaliplatin/paclitaxel,<br>cyclophosphamide/epirubicin/vincristine,<br>docetaxel/irinotecan,<br>docetaxel/5-fluorouracil/oxaliplatin,<br>capecitabine/docetaxel/gemcitabine,<br>L-asparaginase/prednisone/vincristine,<br>cyclophosphamide/etoposide/prednisone/rituximab/vi<br>ncristine, cyclophosphamide/vinorelbine,<br>cyclophosphamide/mitoxantrone/prednisone/vincristi<br>ne,<br>cyclophosphamide/etoposide/prednisone/vincristine,<br>cyclophosphamide/prednisone/rituximab/vincristine,<br>cyclophosphamide/mitoxantrone/prednisone/rituxima<br>b/vincristine, plinabulin, docetaxel, albendazole,<br>mebendazole, vinflunine, vinorelbine, vincristine,<br>vinblastine, paclitaxel, podophyllotoxin, colchicine |
| P68363 | TUBA1B | Tubulin, alpha 1b | Cytoplasm | Other |                                                                                                                                                                                                                                                                                                                                                                                                                                                                                                                                                                                                                                                                                                                                                                                                                                                                                               |
| Q9NY65 | TUBA8  | Tubulin, alpha 8  | Cytoplasm | Other | Epothilone B, colchicine/probenecid, larotaxel,<br>eribulin, davunetide, vintafolide, milataxel,<br>cevipabulin, gemcitabine/paclitaxel,<br>docetaxel/prednisone,<br>cyclophosphamide/prednisone/vincristine,                                                                                                                                                                                                                                                                                                                                                                                                                                                                                                                                                                                                                                                                                 |

---

---

docetaxel/hydrocortisone,  
cyclophosphamide/docetaxel,  
gemcitabine/vinorelbine,  
cyclophosphamide/daunorubicin/imatinib/prednisone/  
vincristine, cyclophosphamide/topotecan/vincristine,  
docetaxel/gemcitabine,  
docetaxel/gemcitabine/vincristine,  
irinotecan/vincristine,  
irinotecan/temozolomide/vincristine,  
bevacizumab/paclitaxel,  
cyclophosphamide/docetaxel/epirubicin/5-fluorouracil  
/trastuzumab, docetaxel/trastuzumab,  
trastuzumab/vinorelbine,  
gemcitabine/oxaliplatin/paclitaxel,  
cyclophosphamide/epirubicin/vincristine,  
docetaxel/irinotecan,  
docetaxel/5-fluorouracil/oxaliplatin,  
capecitabine/docetaxel/gemcitabine,  
L-asparaginase/prednisone/vincristine,  
cyclophosphamide/etoposide/prednisone/rituximab/vi  
ncristine, cyclophosphamide/vinorelbine,  
cyclophosphamide/mitoxantrone/prednisone/vincristi  
ne,  
cyclophosphamide/etoposide/prednisone/vincristine,  
cyclophosphamide/prednisone/rituximab/vincristine,  
cyclophosphamide/mitoxantrone/prednisone/rituxima

---

b/vincristine, plinabulin, docetaxel, vinflunine,  
 vinorelbine, vincristine, vinblastine, paclitaxel,  
 podophyllotoxin, colchicine

|        |         |                                                                                       |                        |                           |
|--------|---------|---------------------------------------------------------------------------------------|------------------------|---------------------------|
| P60709 | ACTB    | Actin, beta                                                                           | Cytoplasm              | Other                     |
| P14136 | GFAP    | Glial fibrillary acidic protein                                                       | Cytoplasm              | Other                     |
| Q562R1 | ACTBL2  | Actin, beta-like 2                                                                    | Nucleus                | Other                     |
| P07195 | LDHB    | Lactate dehydrogenase B                                                               | Cytoplasm              | Enzyme                    |
| P62258 | YWHAE   | Tyrosine 3-monooxygenase/tryptophan<br>5-monooxygenase activation protein,<br>epsilon | Cytoplasm              | Other                     |
| P08758 | ANXA5   | Annexin A5                                                                            | Plasma<br>Membrane     | Other                     |
| P02647 | APOA1   | Apolipoprotein A-I                                                                    | Extracellular<br>Space | Transporter               |
| P06733 | ENO1    | Enolase 1, (alpha)                                                                    | Cytoplasm              | Enzyme                    |
| Q13332 | PTPRS*  | Protein tyrosine phosphatase, receptor<br>type, S                                     | Plasma<br>Membrane     | Phosphatase               |
| Q13332 | PTPRS*  | Protein tyrosine phosphatase, receptor<br>type, S                                     | Plasma<br>Membrane     | Phosphatase               |
| Q96P48 | ARAP1   | ArfGAP with RhoGAP domain, ankyrin<br>repeat and PH domain 1                          | Cytoplasm              | Other                     |
| Q8TEP8 | CEP192  | Centrosomal protein 192kDa                                                            | Cytoplasm              | Other                     |
| Q9Y4D7 | PLXND1  | Plexin D1                                                                             | Plasma<br>Membrane     | Transmembrane<br>receptor |
| Q9P2D3 | HEATR5B | HEAT repeat containing 5B                                                             | Other                  | Other                     |
| Q5MCW4 | ZNF569  | Zinc finger protein 569                                                               | Nucleus                | Other                     |

---

|        |       |                                      |           |                            |
|--------|-------|--------------------------------------|-----------|----------------------------|
| P06865 | HEXA  | Hexosaminidase A (alpha polypeptide) | Cytoplasm | Enzyme                     |
| P49639 | HOXA1 | Homeobox A1                          | Nucleus   | Transcription<br>regulator |
| Q6P2Q9 | PRPF8 | Pre-mRNA processing factor 8         | Nucleus   | Other                      |

---

**Supplemental Table 3. Signaling pathway networks that involve phosphotyrosine-containing proteins identified from human glioblastoma.**

| <b>Networks</b> | <b>Nodes (genes; proteins) in Network</b>                                                                                                                                                                                                                                                                            | <b>Score</b> | <b>Nodes</b> | <b>Identified nodes (pY-proteins)</b> | <b>Top Diseases and Functions</b>                                                      |
|-----------------|----------------------------------------------------------------------------------------------------------------------------------------------------------------------------------------------------------------------------------------------------------------------------------------------------------------------|--------------|--------------|---------------------------------------|----------------------------------------------------------------------------------------|
| 1               | 14-3-3, ACTB, Akt, Alpha tubulin, ANXA5, APOA1, Ck2, DNAJC24, DNAJC25, ENO1, ERK, ERK1/2, GFAP, HOXA1, HSP, Hsp70, Hsp90, HSP90AA1, HSP90AB1, HSPA1A/HSPA1B, Insulin, Jnk, NFkB (complex), P38 MAPK, PRPF8, PTPRS, RNA polymerase II, Rock, TRAP1, TUBA8, TUBA1A, TUBA1B, tubulin (complex), tubulin (family), YWHAE | 43           | 36           | 16                                    | Cancer, Organismal Injury and Abnormalities, Reproductive System Disease               |
| 2               | ACTBL2, ARAP1, CD1E, CEP85, CEP192, CHI3L2, DCHS1, EFR3A, GPR126, GPR176, HEATR5B, HEXA, HPS1, LDHAL6A, LDHAL6B, LDHB, MRPS33, NLRC3, PLEK2, PLXND1, PSD3, PXMP2, RAB37, RABL2B, RBM12B, RNASE7, SLC16A5, SLC43A2, SPATA2L, SYNGR3, TMEM115, TNF, UBC, UTP11L, ZNF330                                                | 15           | 35           | 7                                     | Cell Morphology, Cellular Assembly and Organization, Cellular Function and Maintenance |
| 3               | CBX5, CDC37, ZNF569                                                                                                                                                                                                                                                                                                  | 3            | 3            | 1                                     | Cancer, Organismal Injury and Abnormalities, Developmental Disorder                    |

# Supplemental Figure 1

## Significant canonical pathways involved phosphotyrosine-containing proteins in a glioblastoma tissue

1. 14-3-3-mediated signaling
2. Aldosterone signaling in epithelial cells
3. Aryl hydrocarbon receptor signaling
4. Axonal guidance signaling
5. Breast cancer regulation by stathmin1
6. Cell cycle G2/M DNA damage checkpoint regulation
7. Chondroitin sulfate degradation (Metazoa)
8. Clathrin-mediated endocytosis signaling
9. Dematan sulfate degradation (Metazoa)
10. eNOS signaling
11. Epithelial adherens junction signaling
12. Gap junction signaling
13. Germ cell-sertoli cell junction signaling
14. Glucocorticoid receptor signaling
15. Gluconeogenesis I
16. Glycolysis I
17. HIF1a signaling
18. Hypoxia signaling in the cardiovascular system
19. Mechanisms of viral exit from host cells
20. Mitotic roles of Polo-like kinase
21. MSP-RON signaling pathway
22. Neuregulin signaling
23. Neuroprotective role of THOP1 in Alzheimer's Disease
24. Nitric oxide signaling in the cardiovascular system
25. PI3K-AKT signaling
26. PPAR signaling
27. PPARa-RXRa activation
28. Prostate cancer signaling
29. Protein ubiquitination pathway
30. Pyruvate fermentation to lactate
31. Remodeling of epithelial adherens junctions
32. Sertoli cell-sertoli cell junction signaling
33. Signaling by Rho family GTPases
34. Telomerase signaling
35. VEGF signaling
36. Xenobiotic metabolism signaling



# 1. 14-3-3-mediated signaling

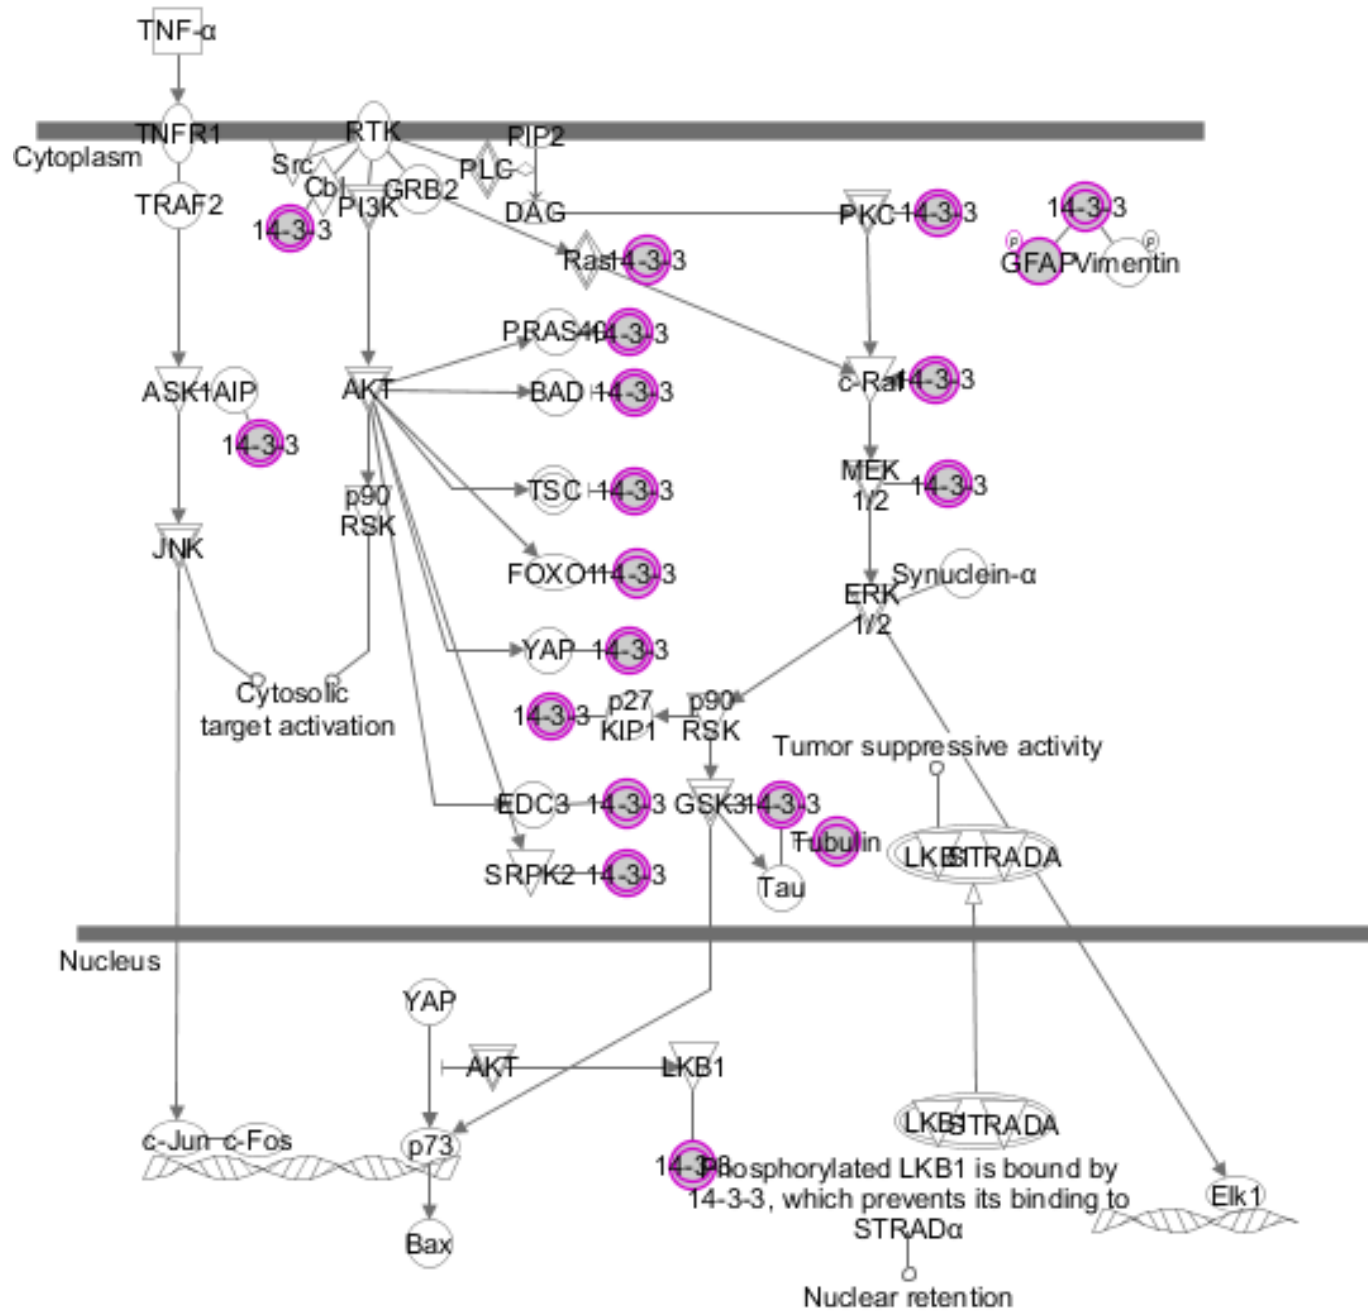

## 2. Aldosterone signaling in epithelial cells

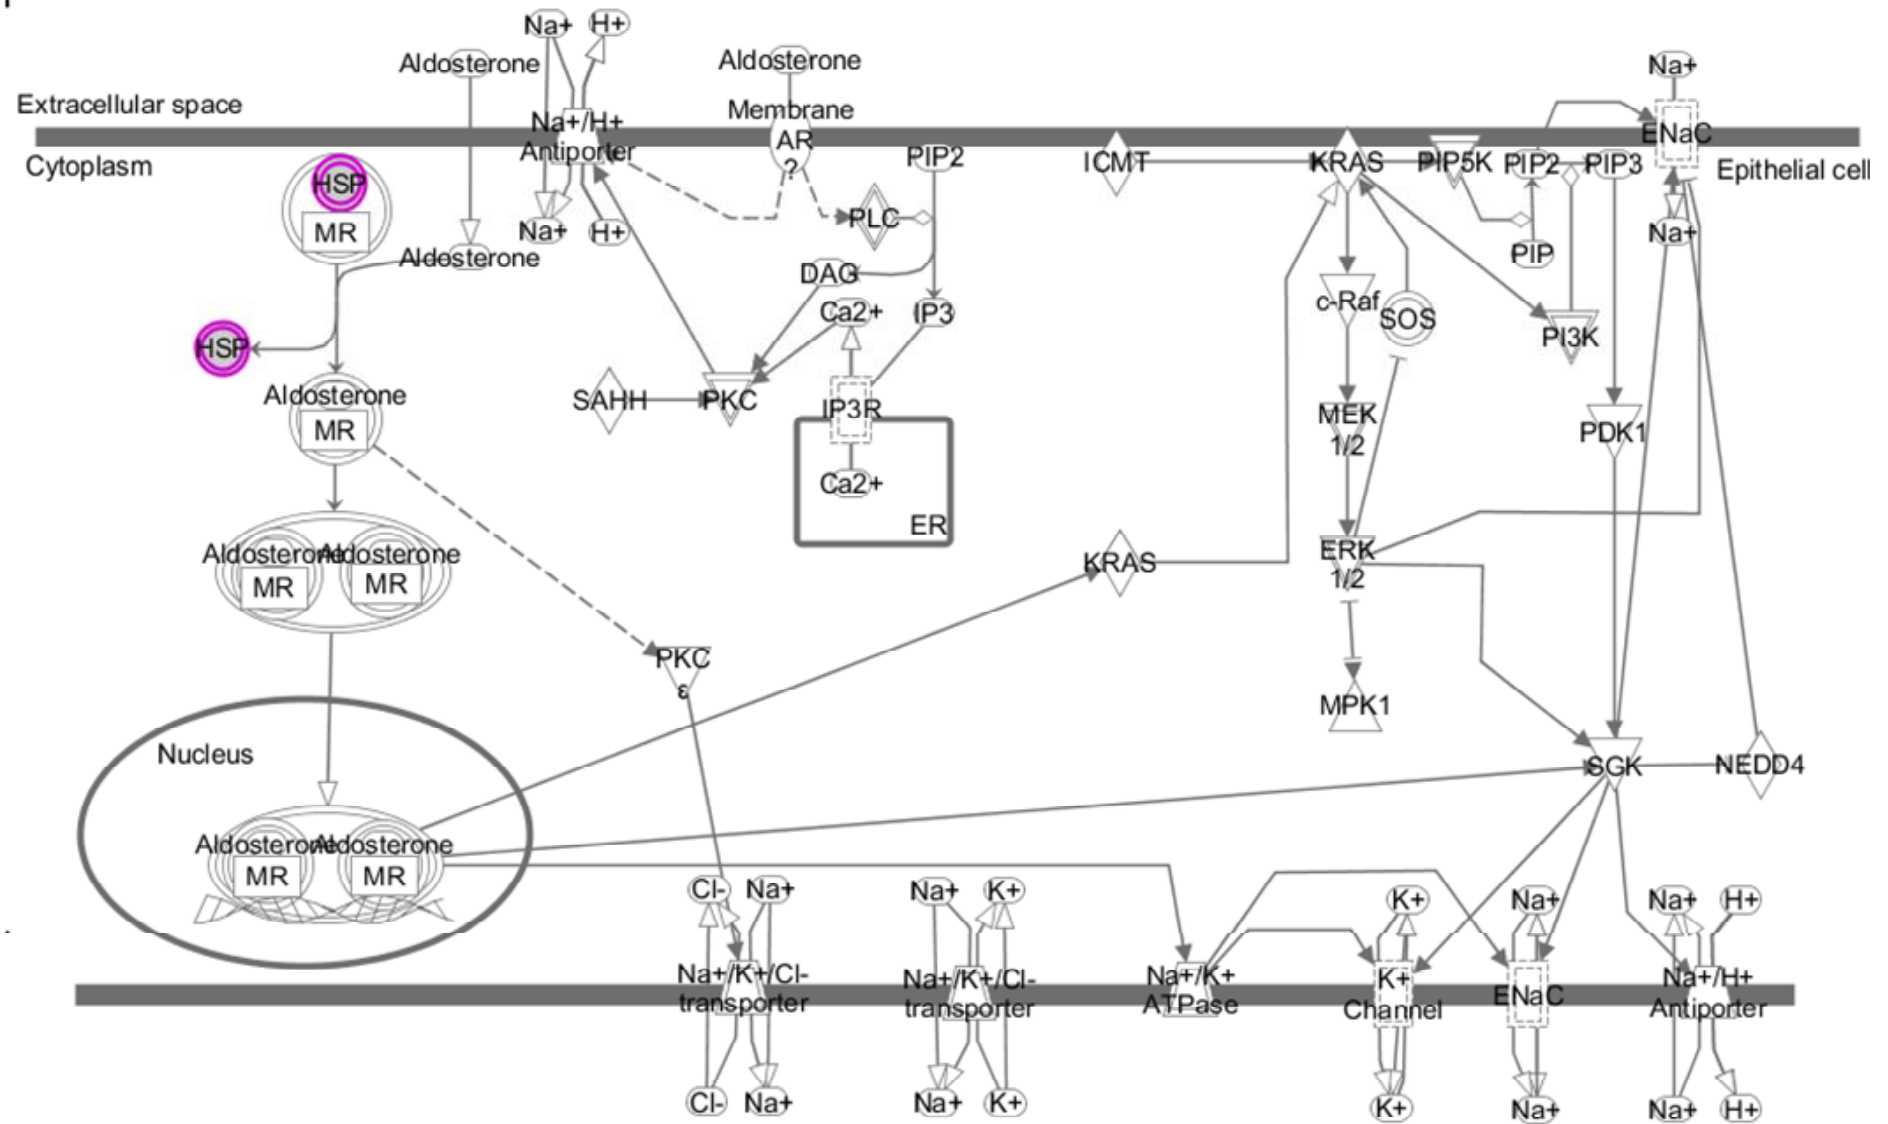

### 3. Aryl hydrocarbon receptor signaling

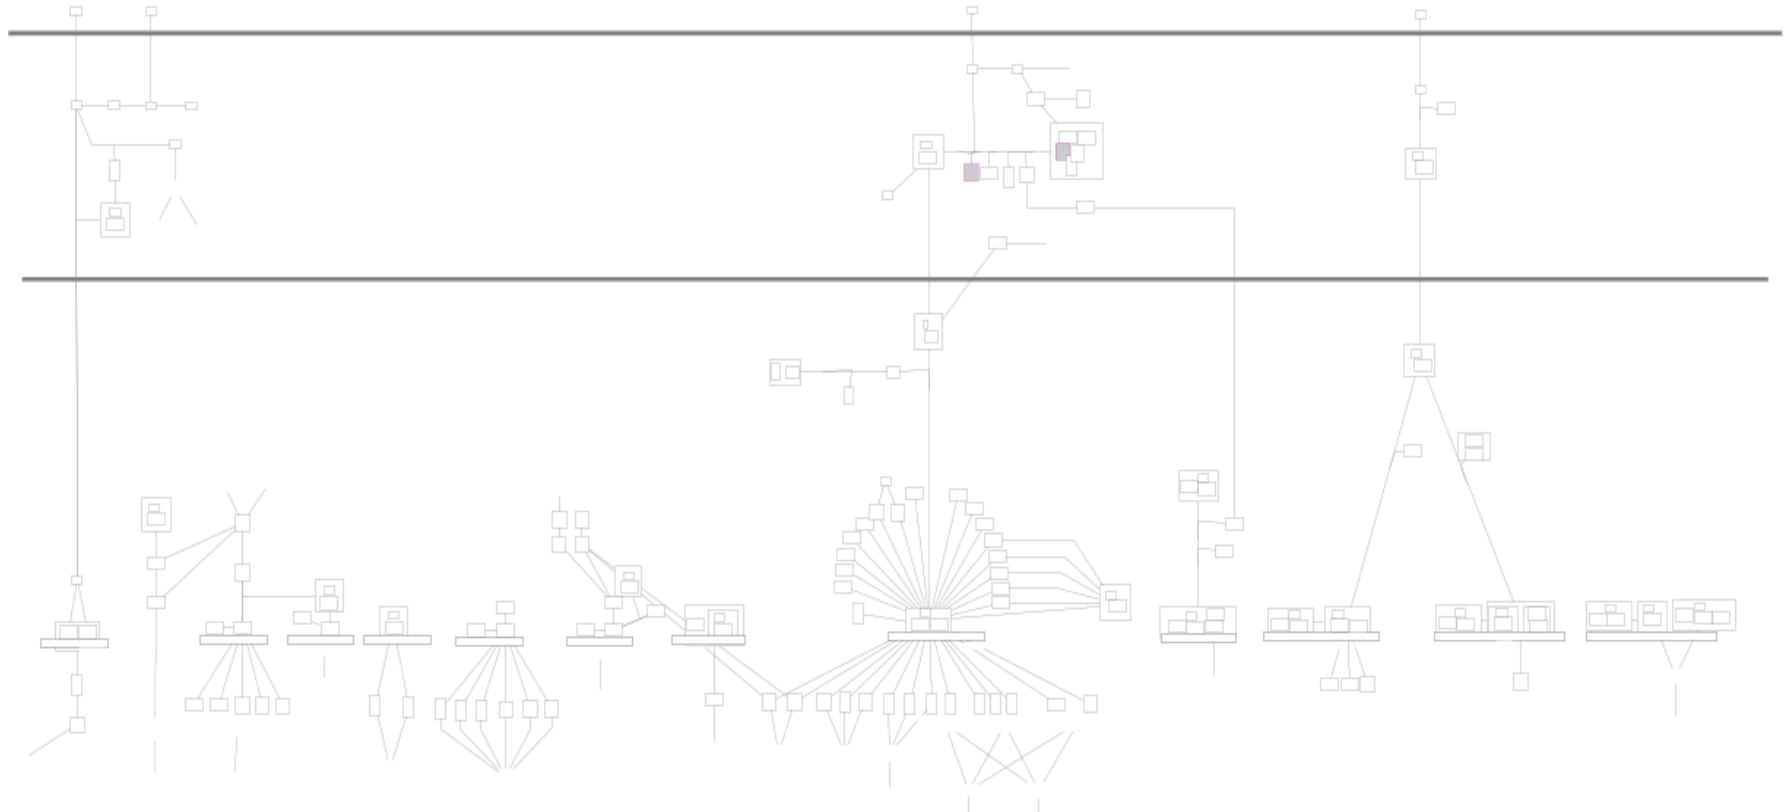

# 4. Axonal guidance signaling

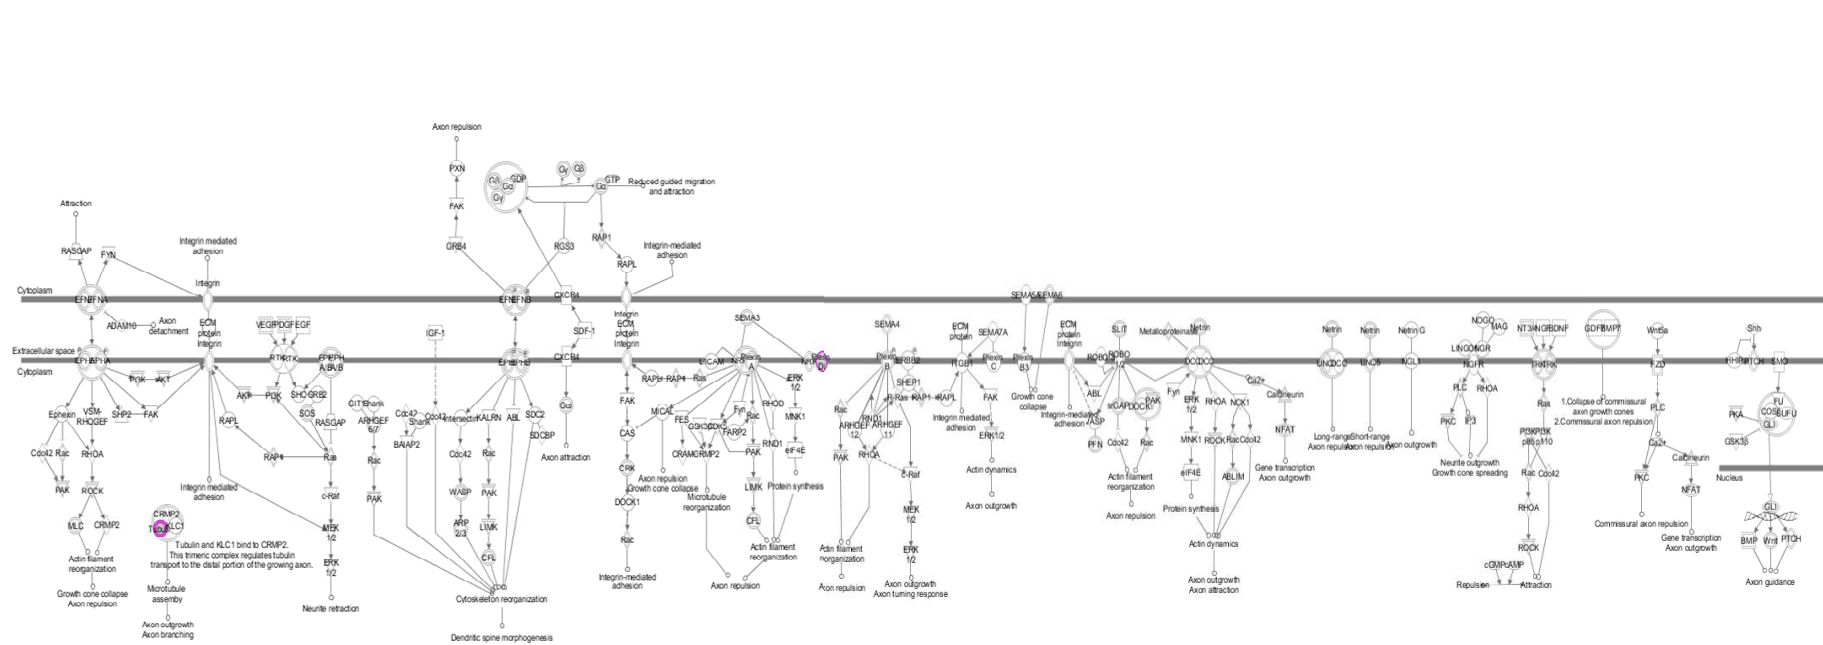

# 5. Breast cancer regulation by stathmin1

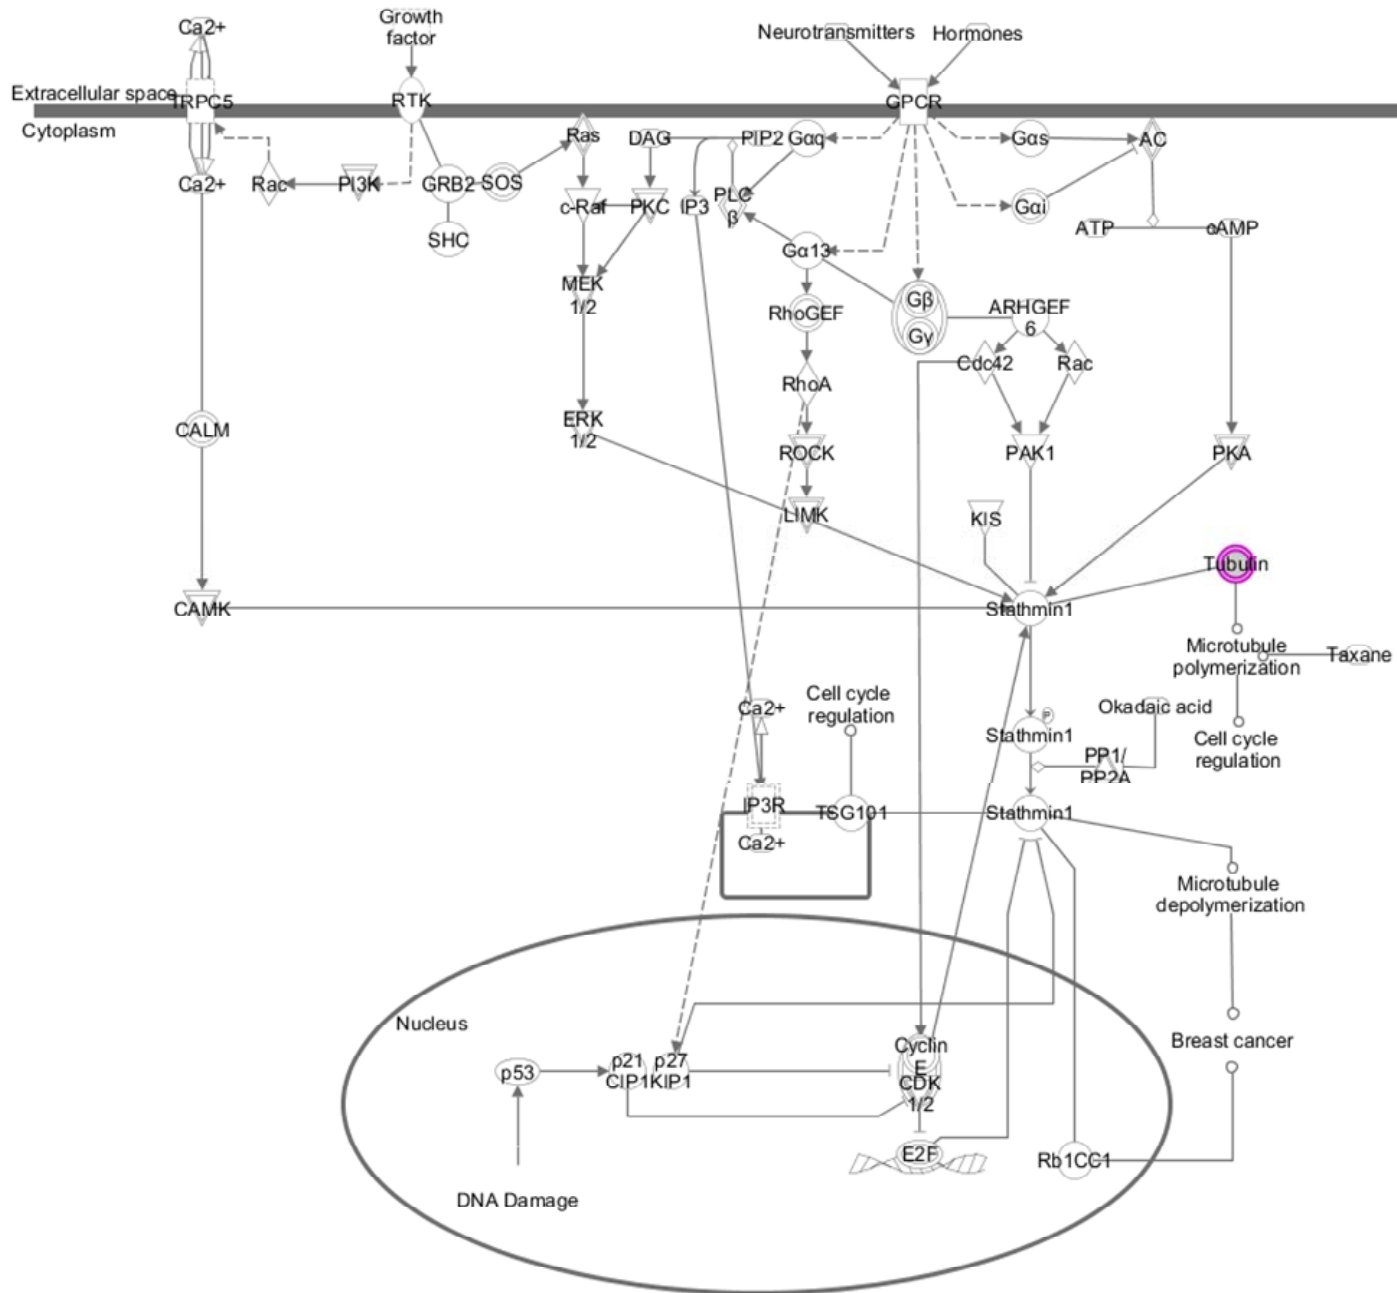

## 6. Cell cycle G2/M DNA damage checkpoint regulation

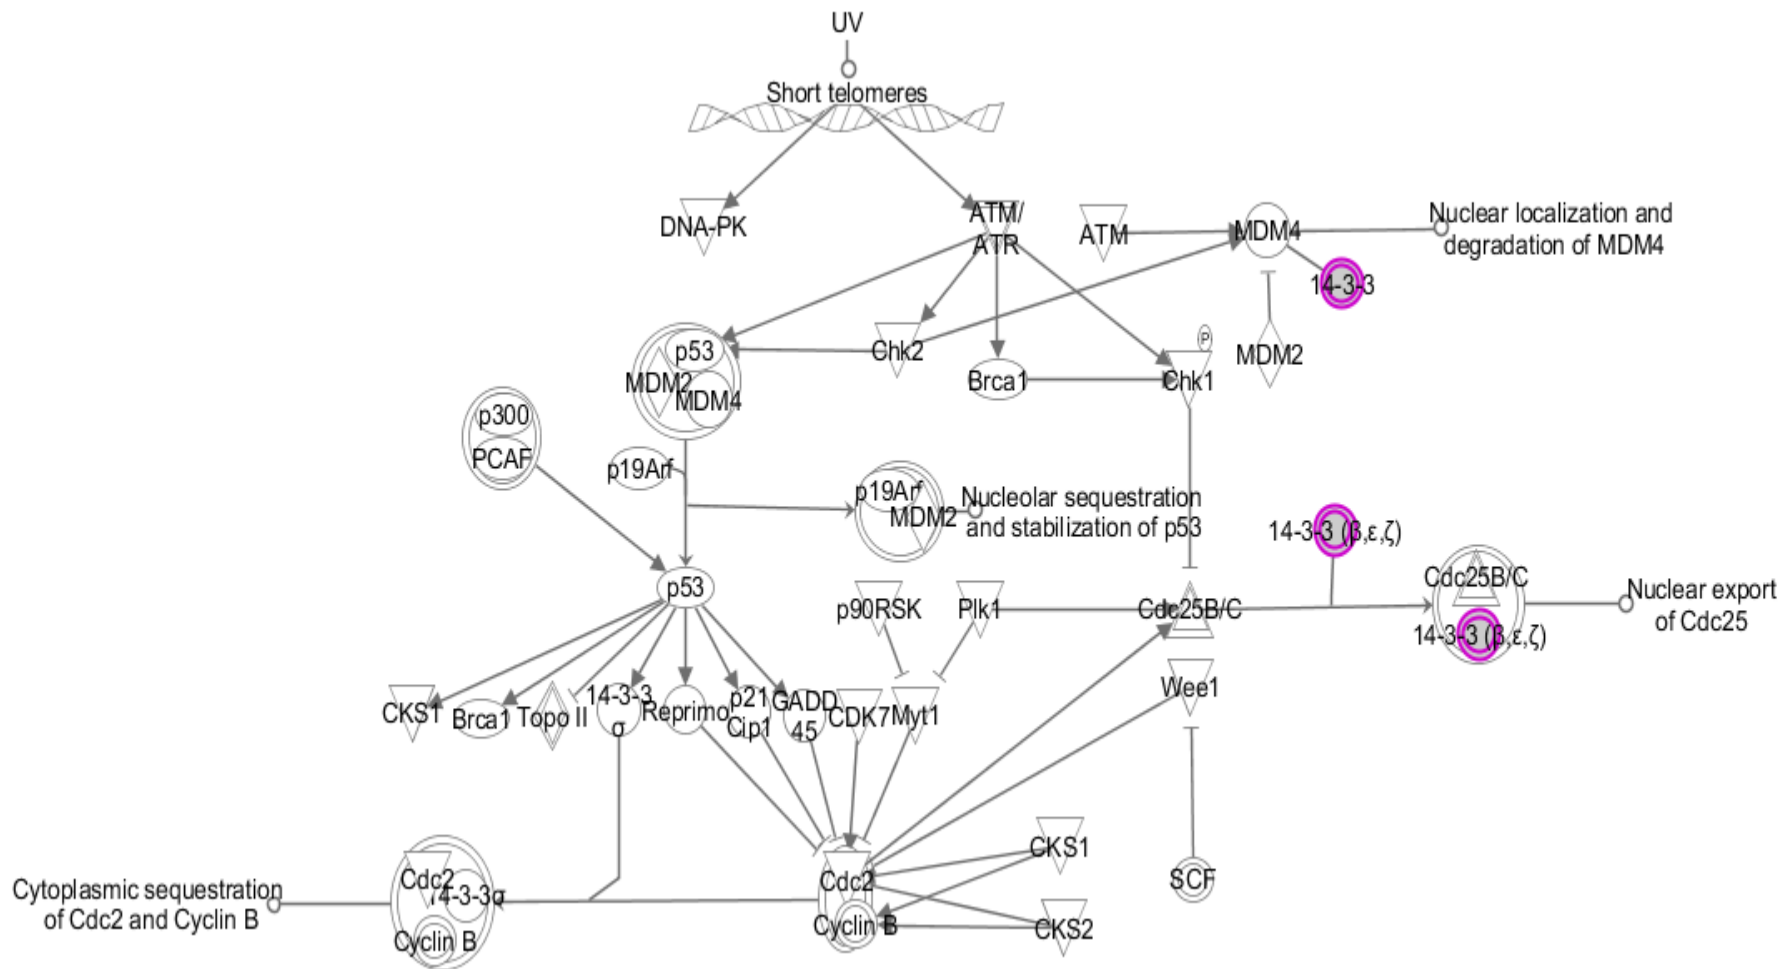

## 7. Chondroitin sulfate degradation (Metazoa)

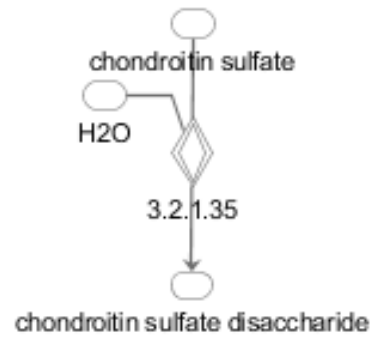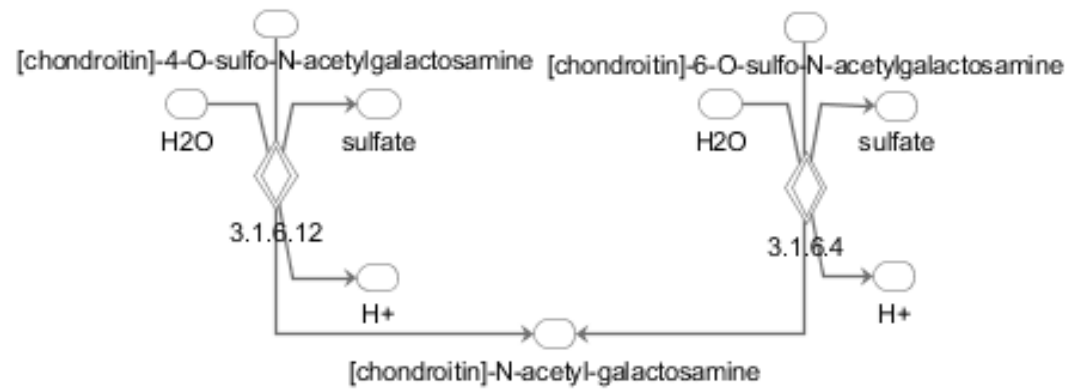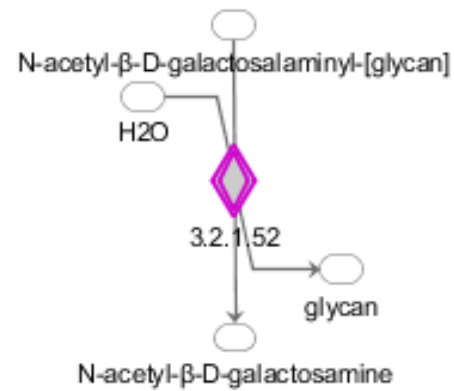

# 8. Clathrin-mediated endocytosis signaling

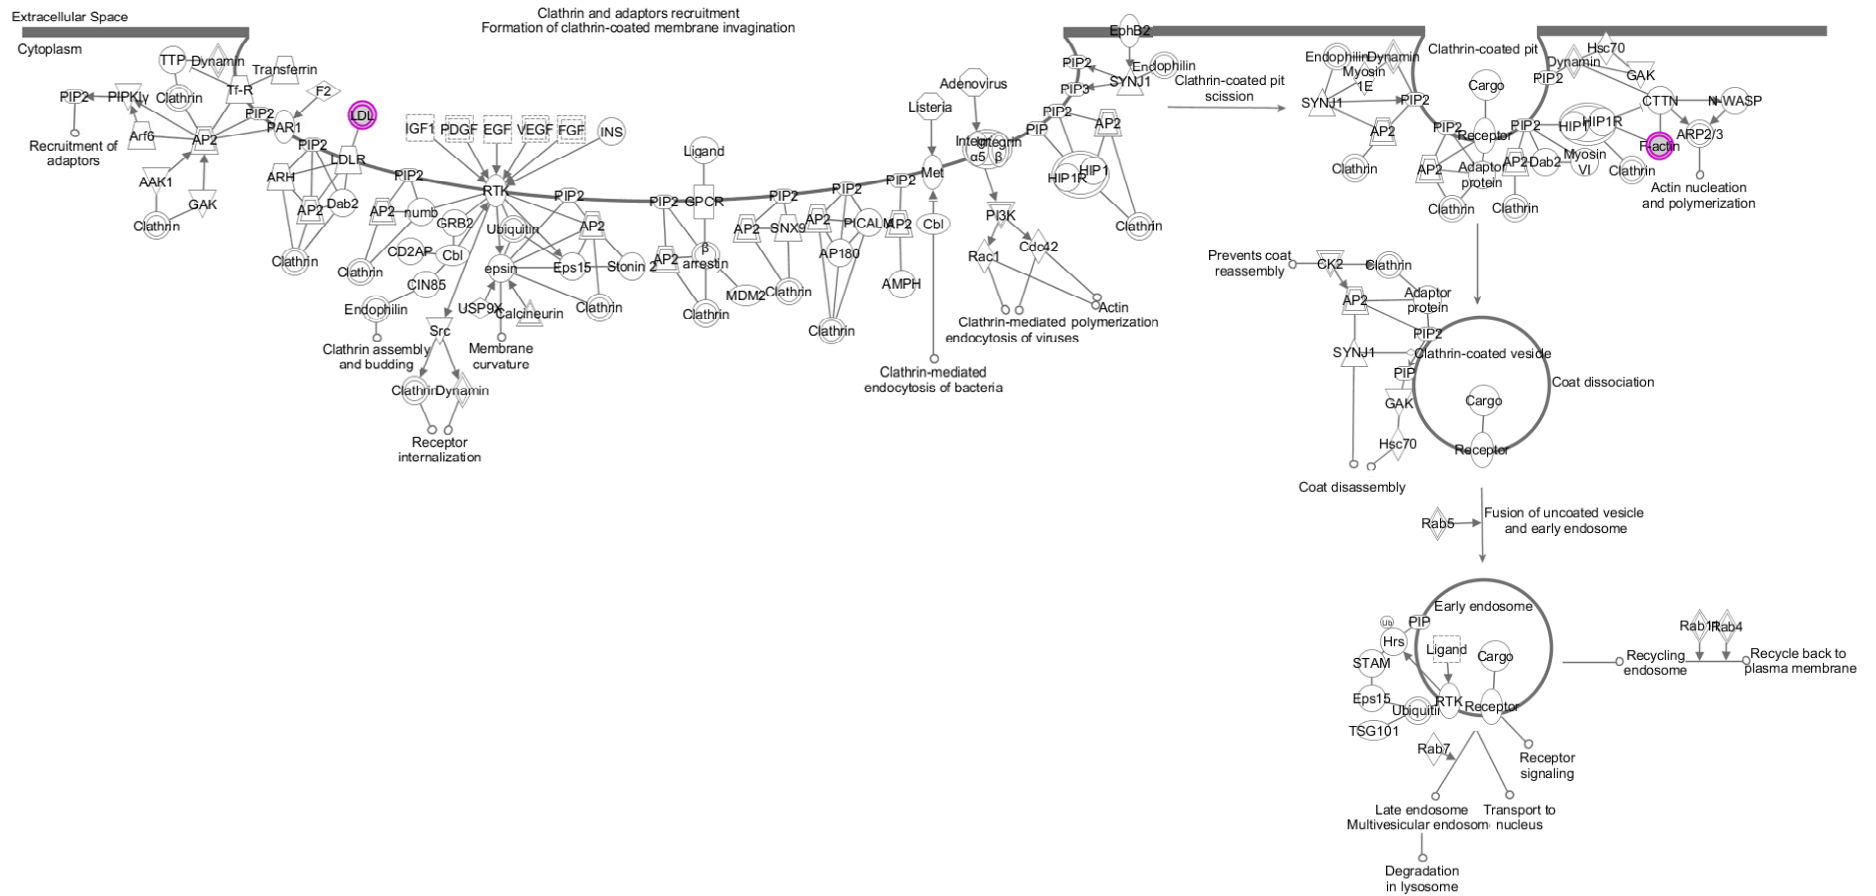



# 9. Dermatan sulfate degradation (Metazoa)

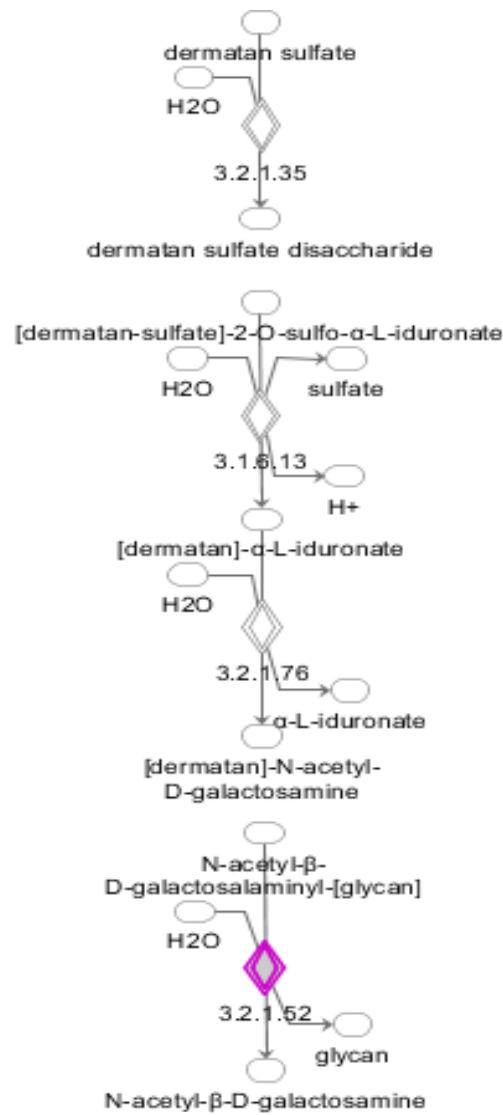

# 10. eNOS signaling

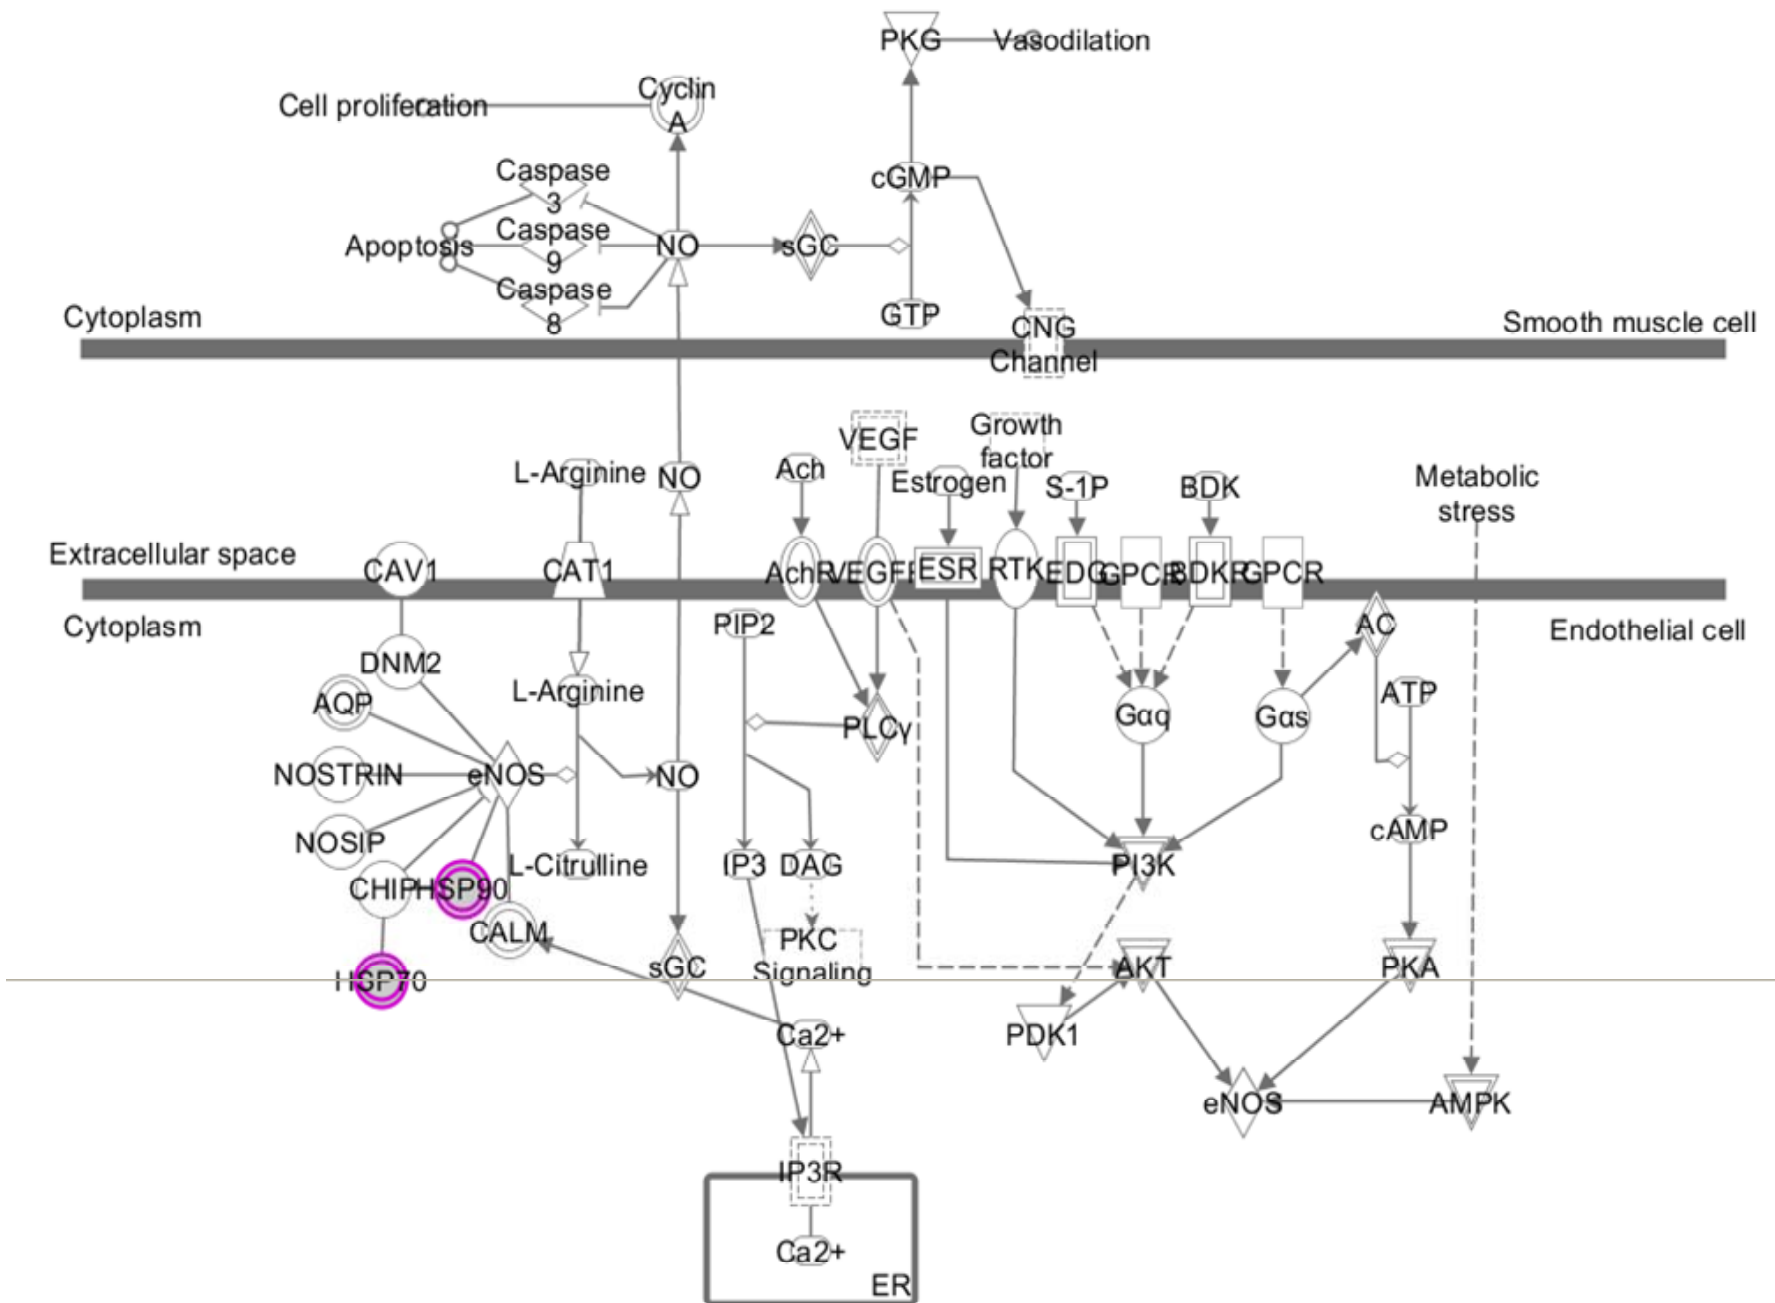

# 11. Epithelial adherens junction signaling

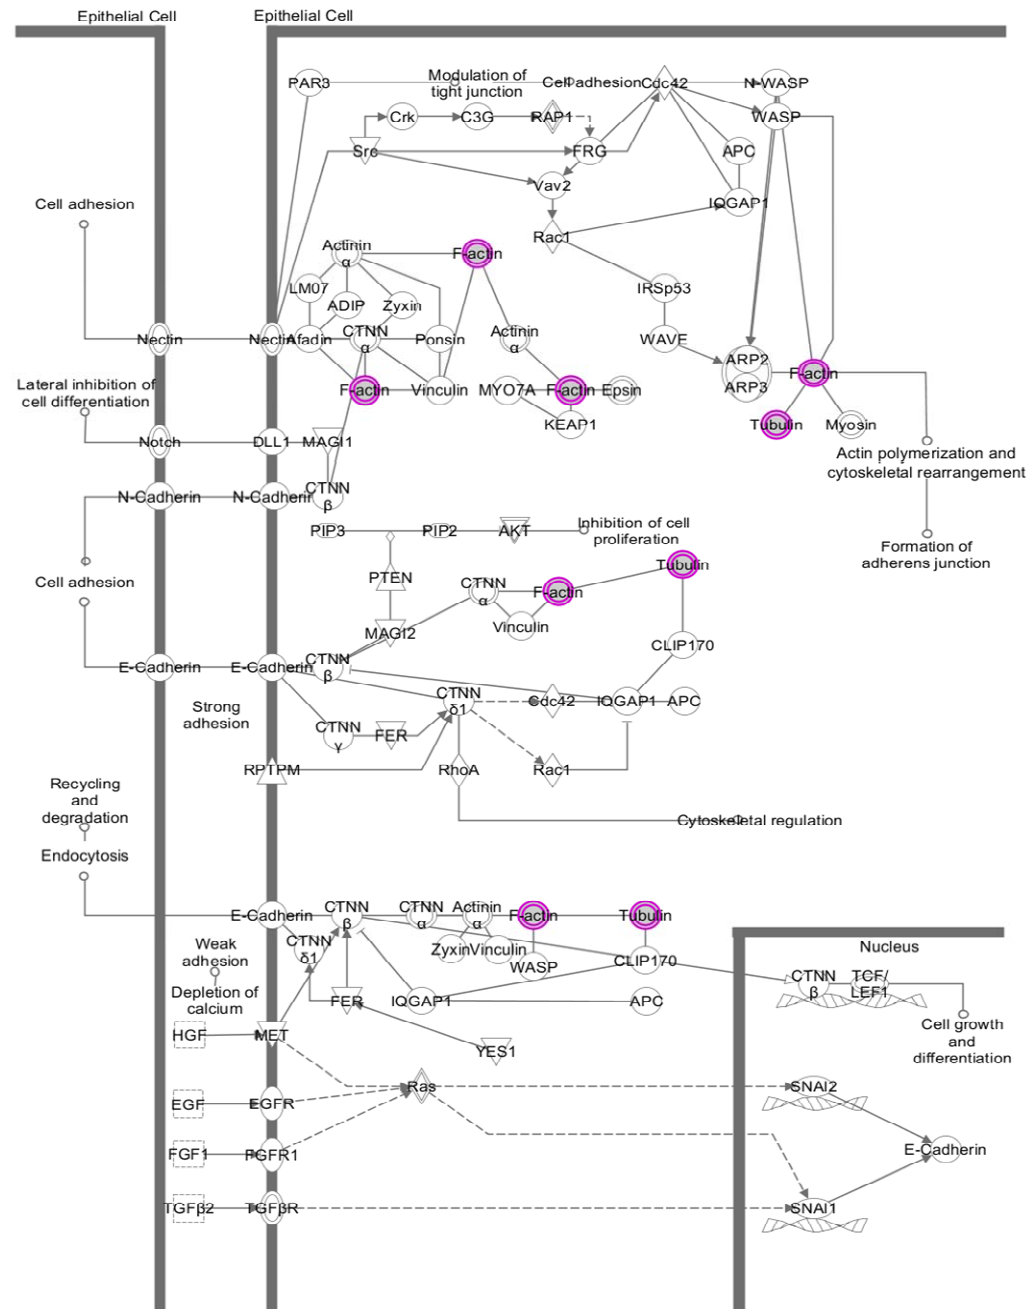

# 12. Gap junction signaling

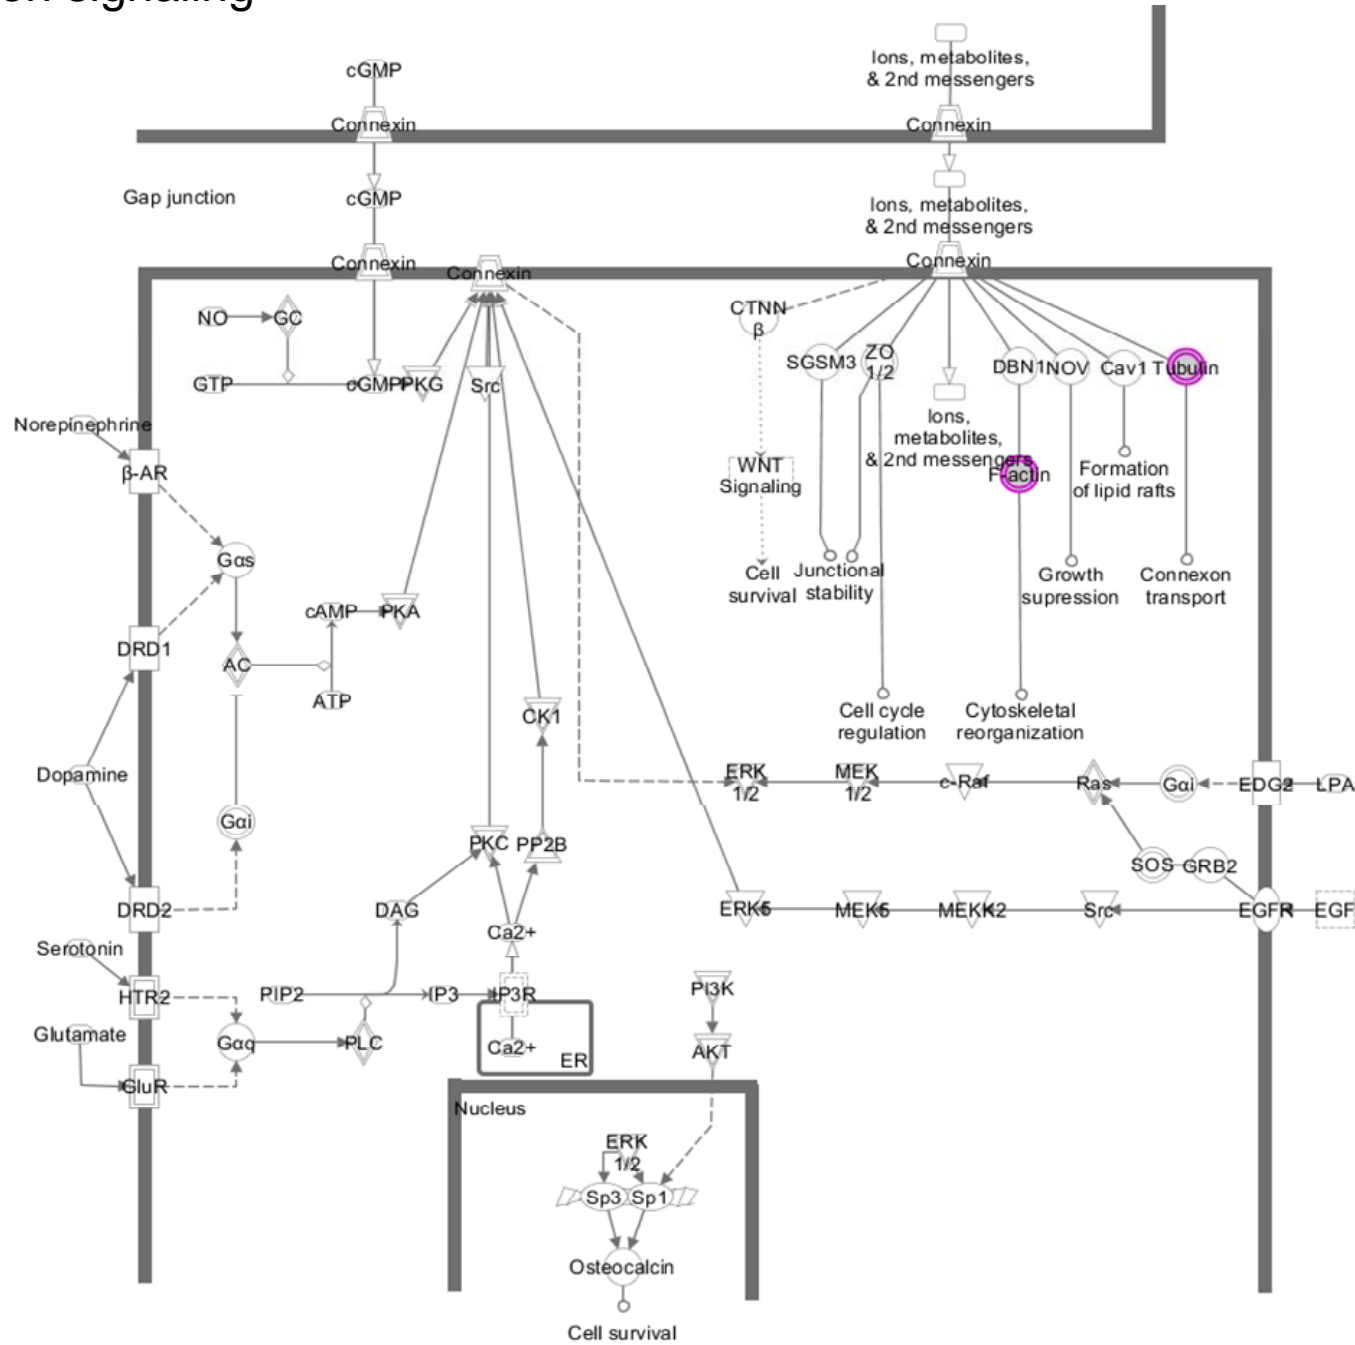

# 13. Germ cell-sertoli cell junction signaling

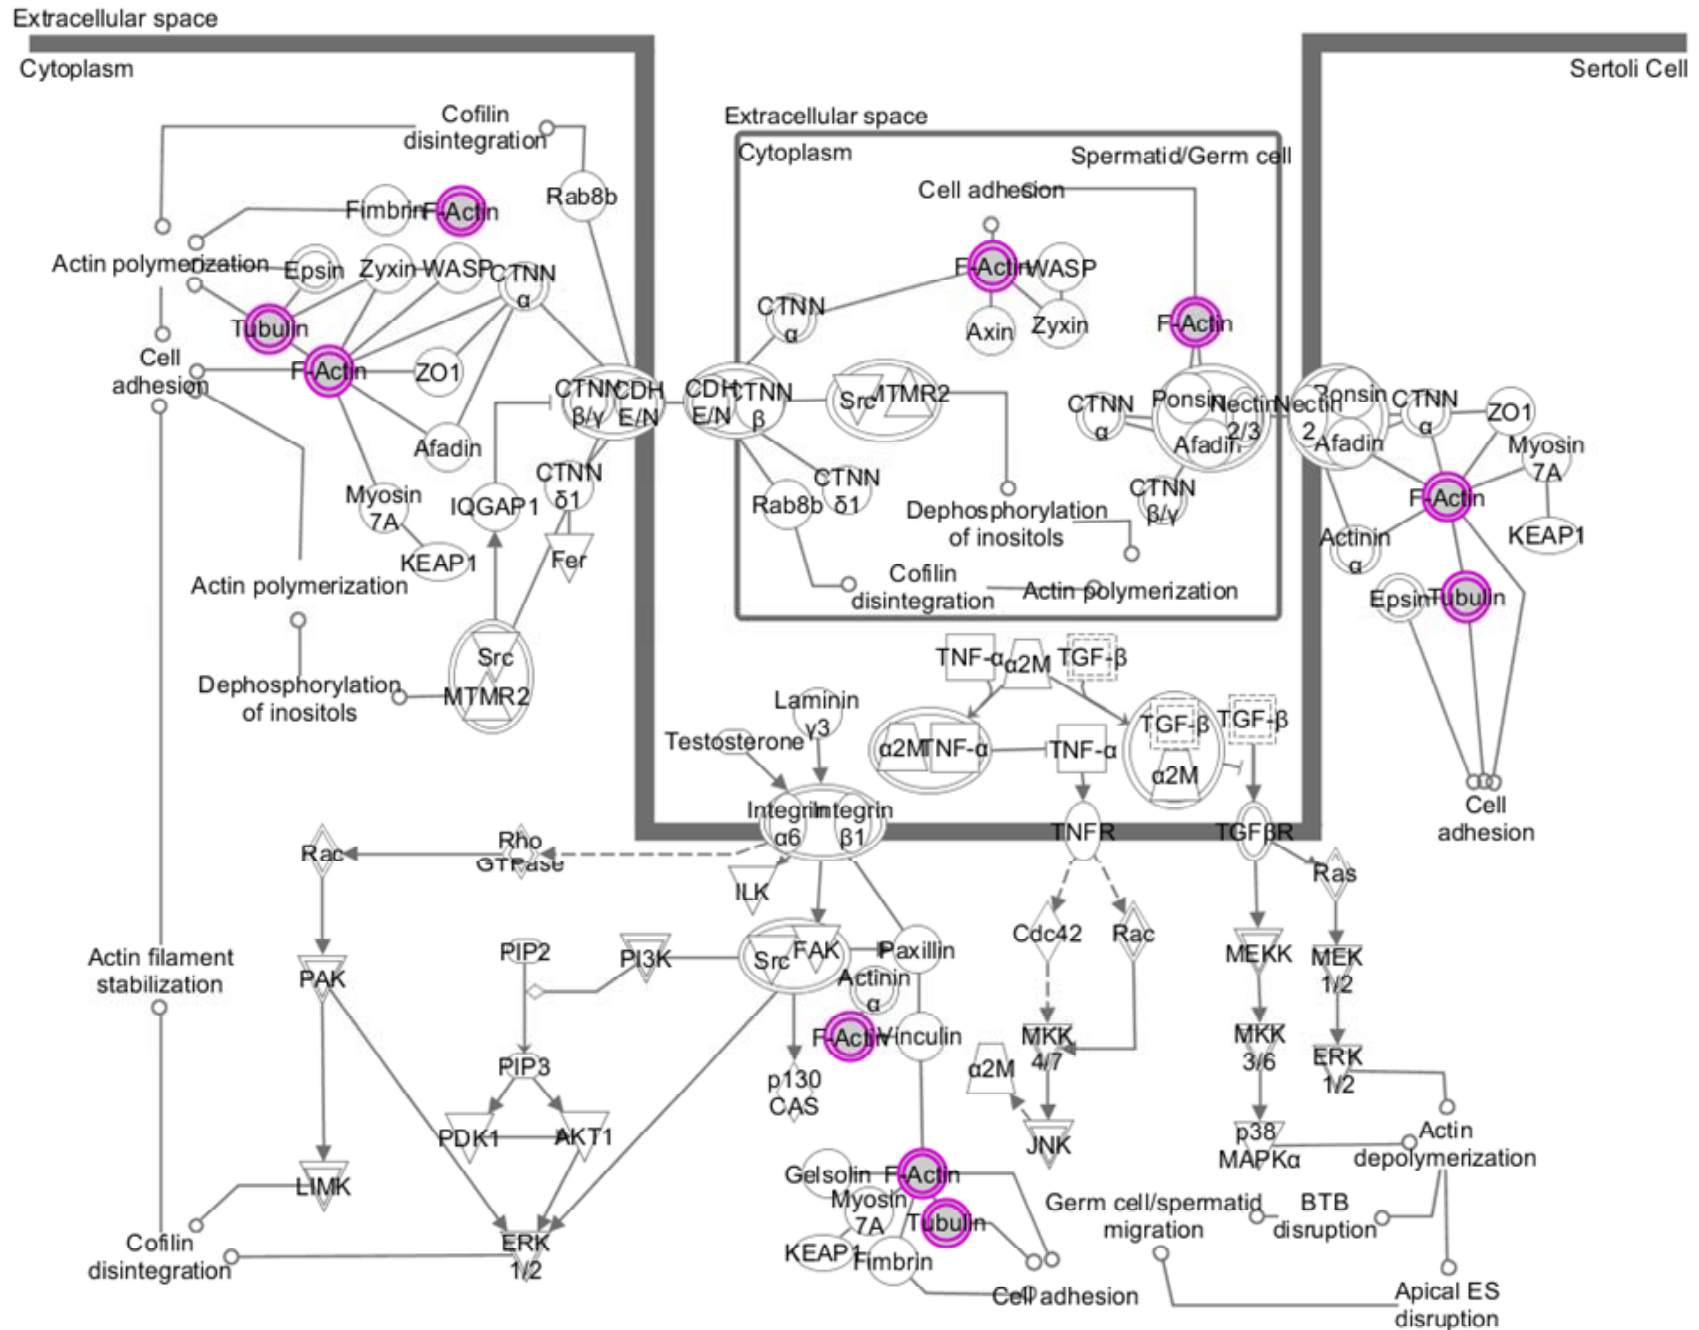

# 14. Glucocorticoid receptor signaling

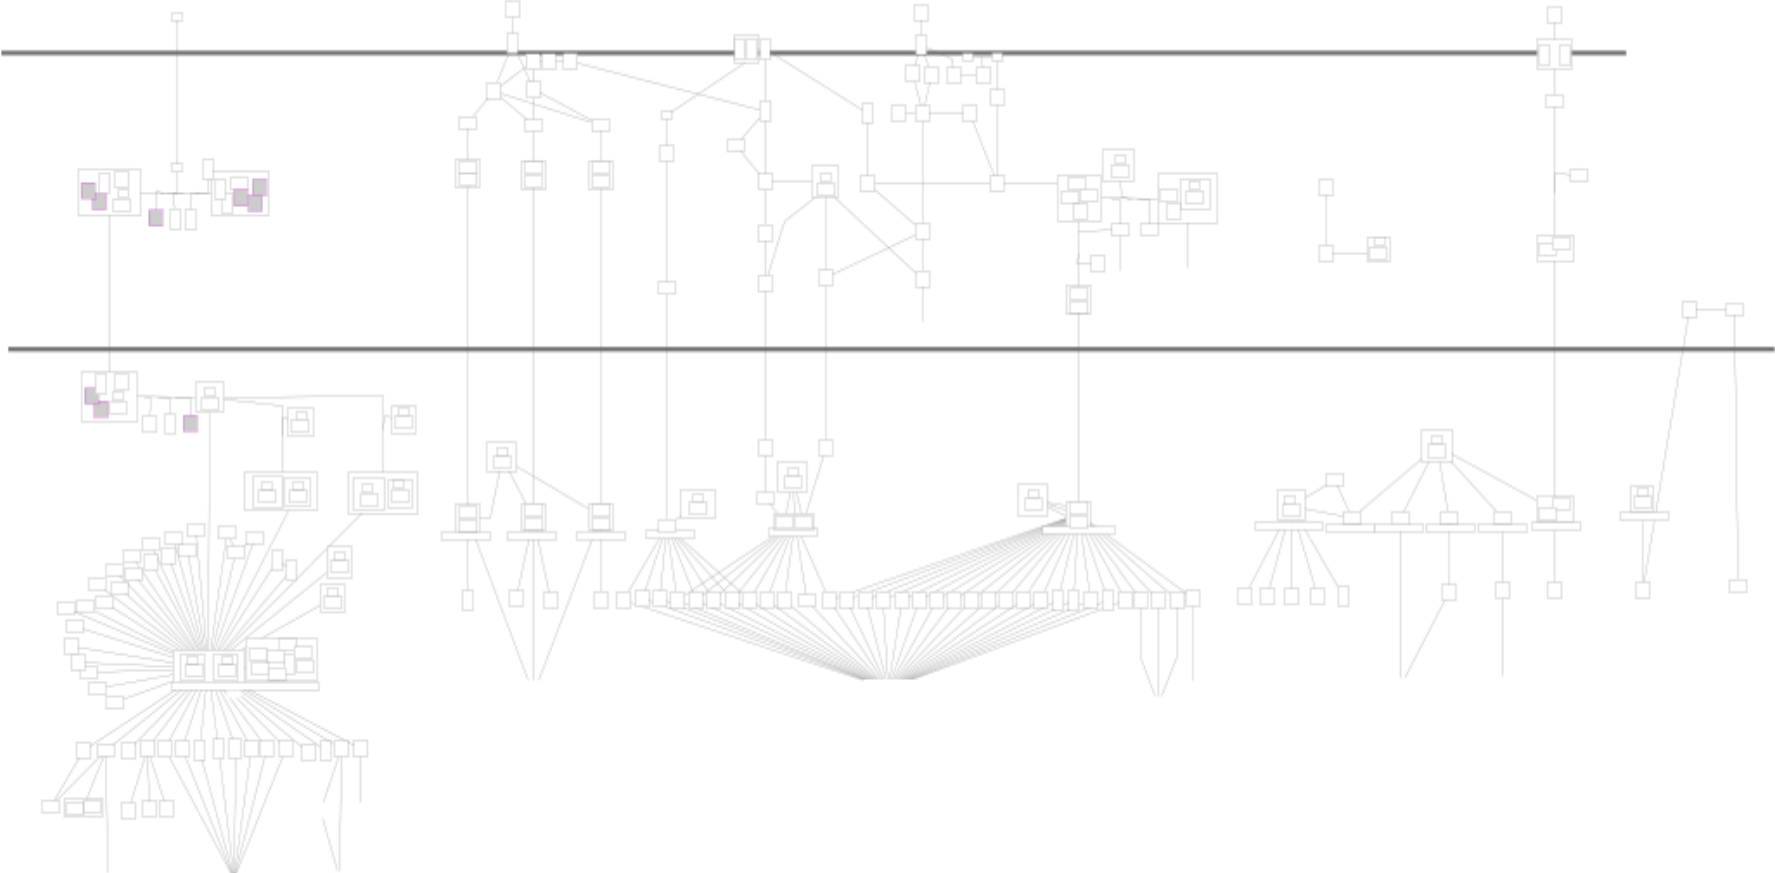

# 15. Gluconeogenesis I

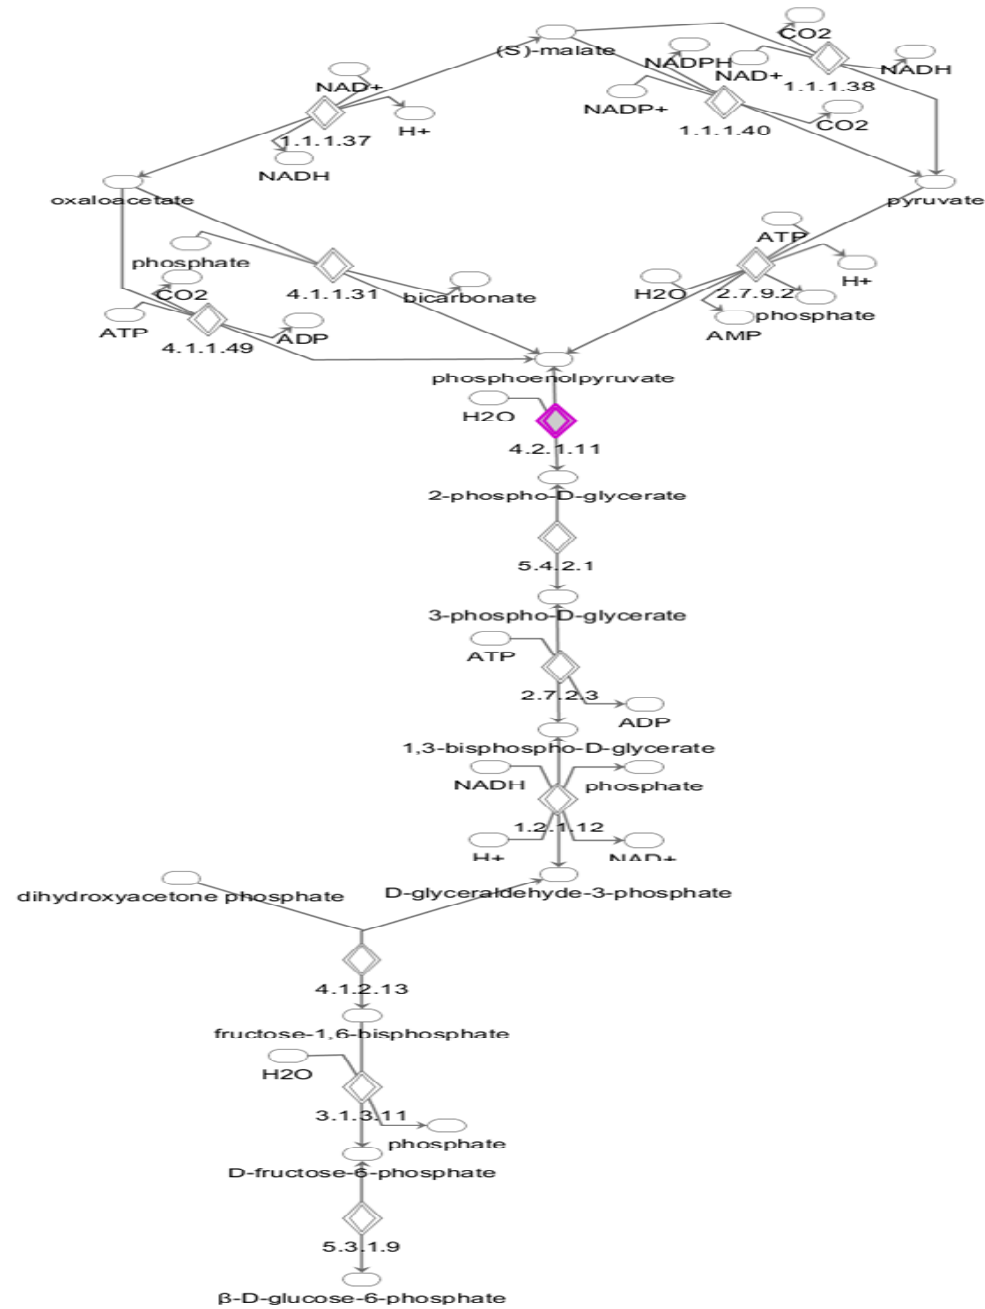

# 16. Glycolysis I

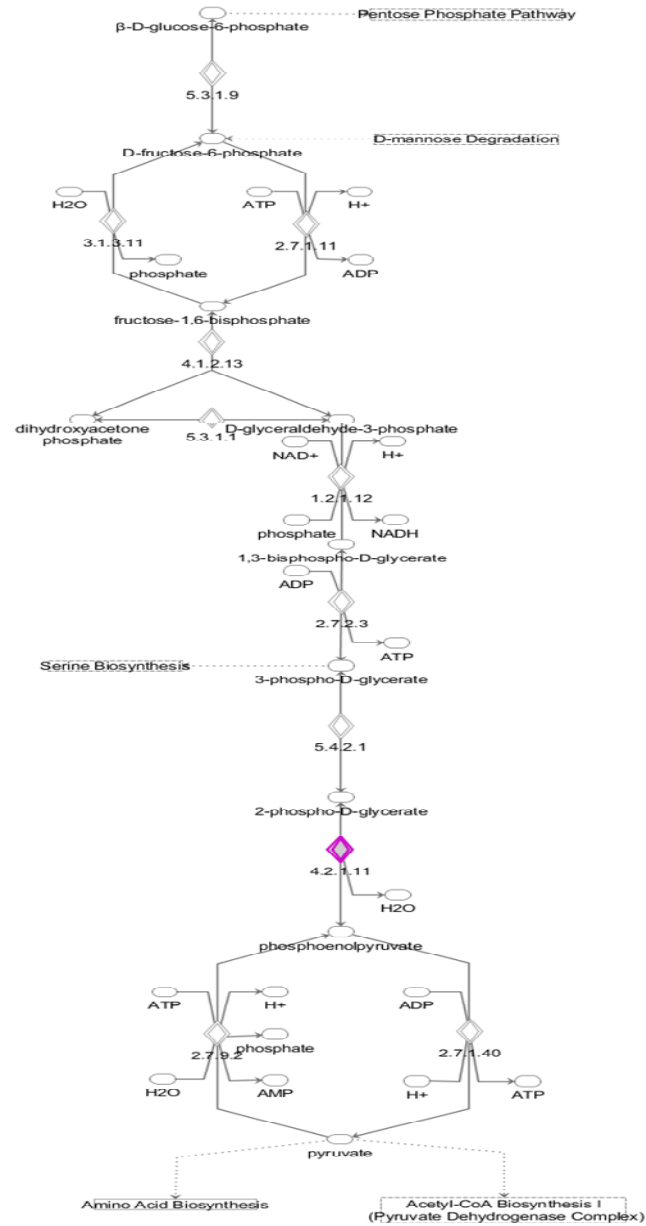



# 17. HIF1a signaling

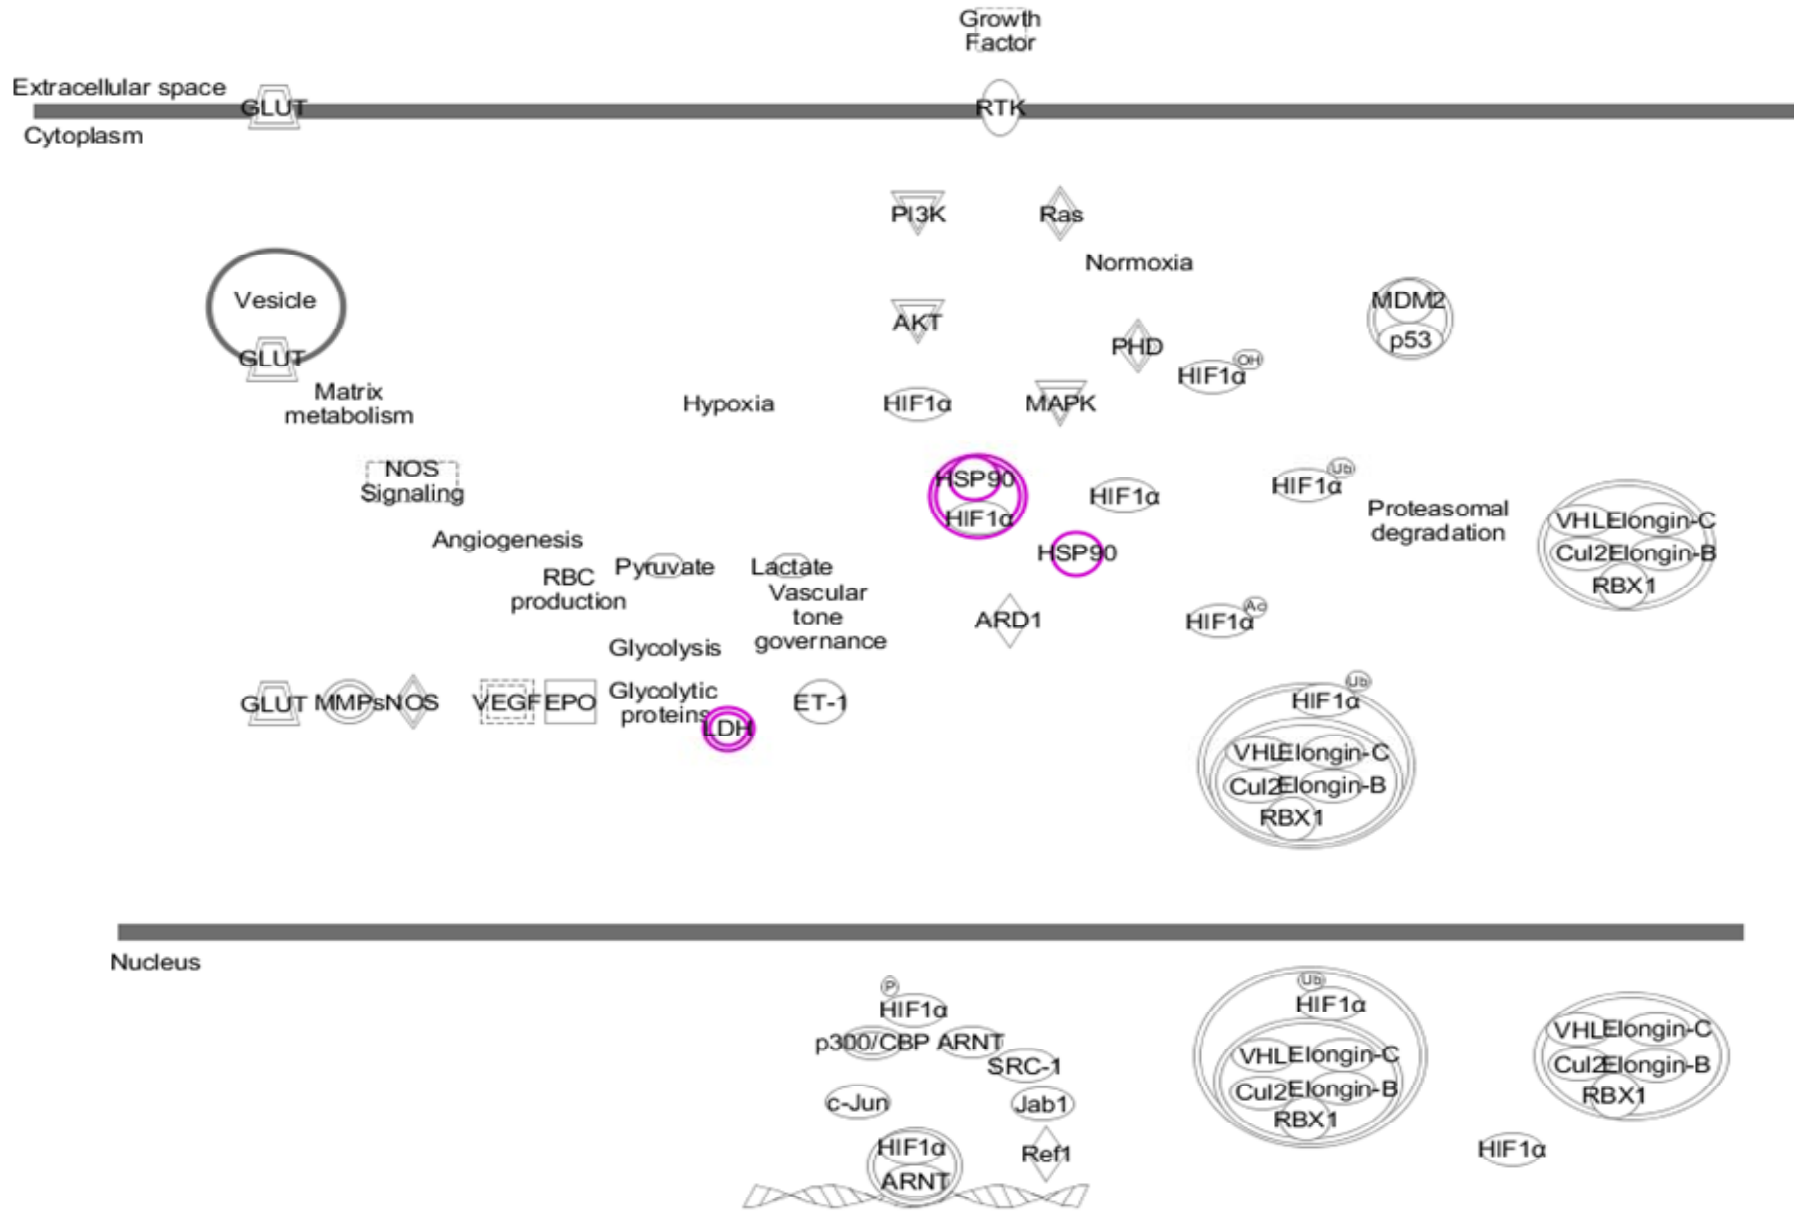

## 18. Hypoxia signaling in the cardiovascular system

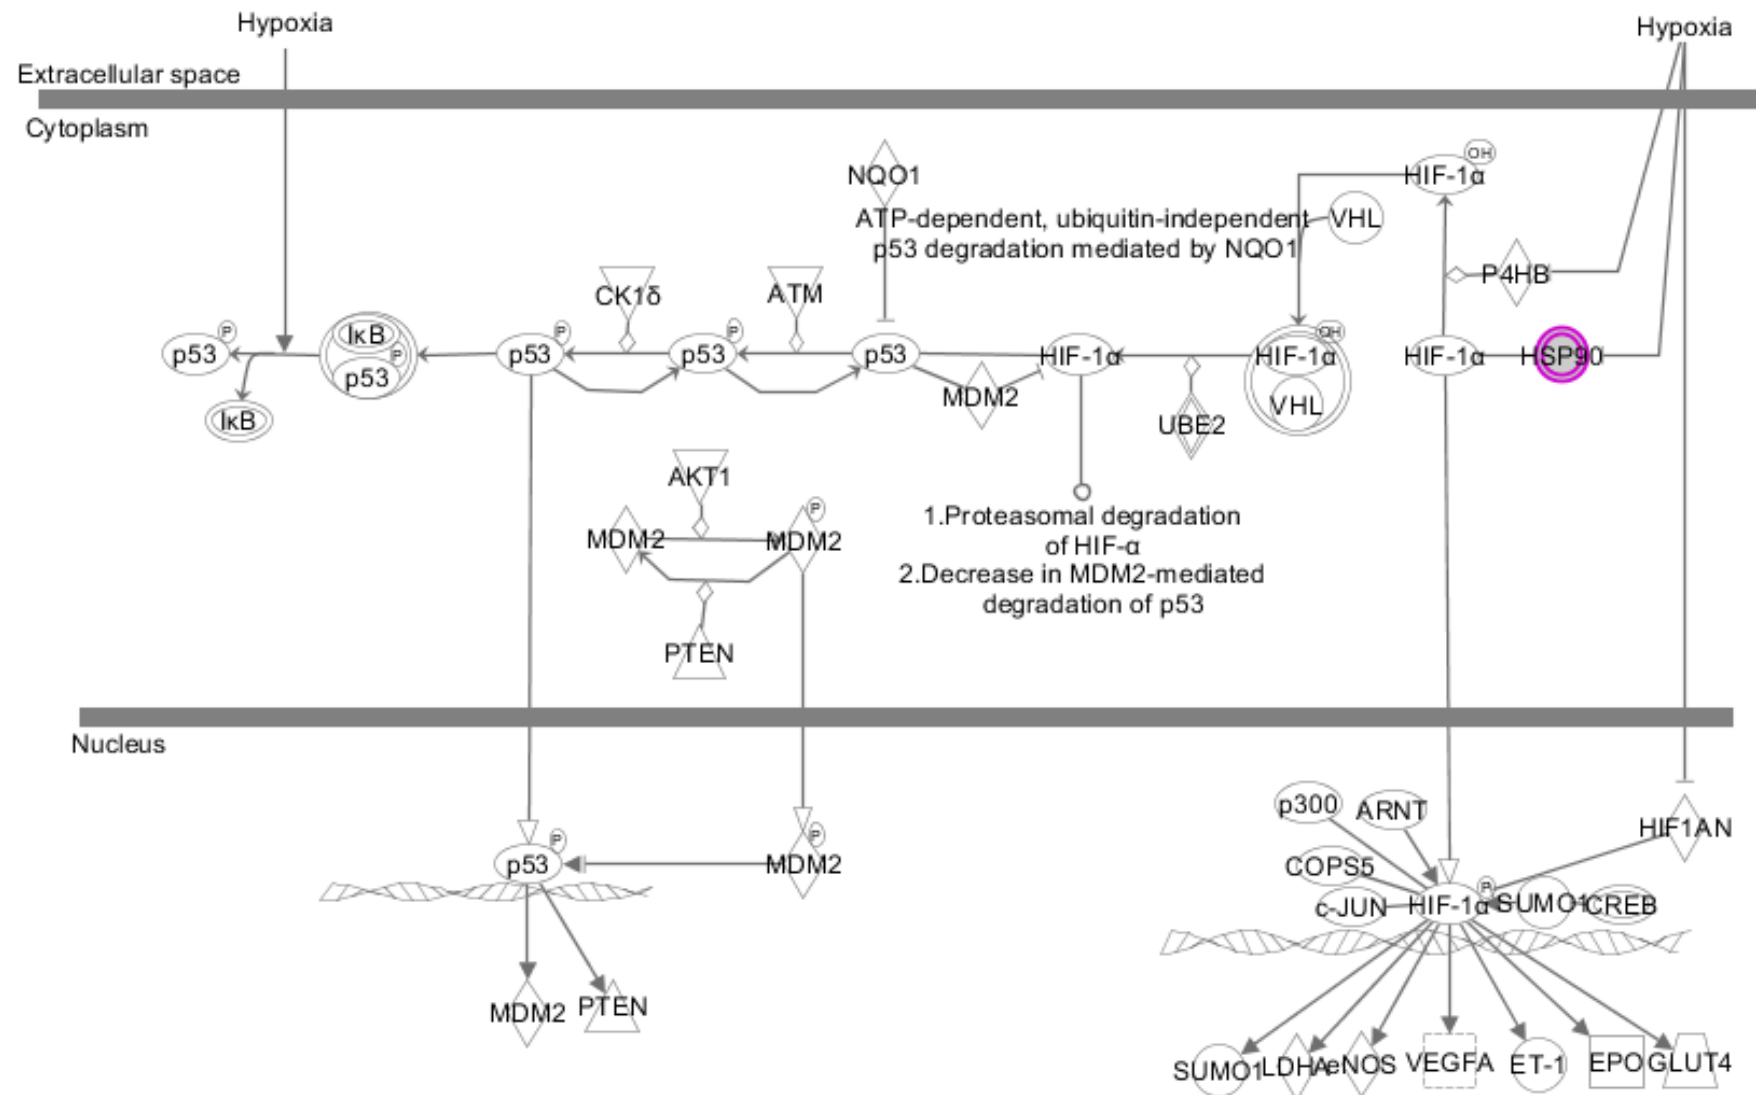

# 19. Mechanisms of viral exit from host cells

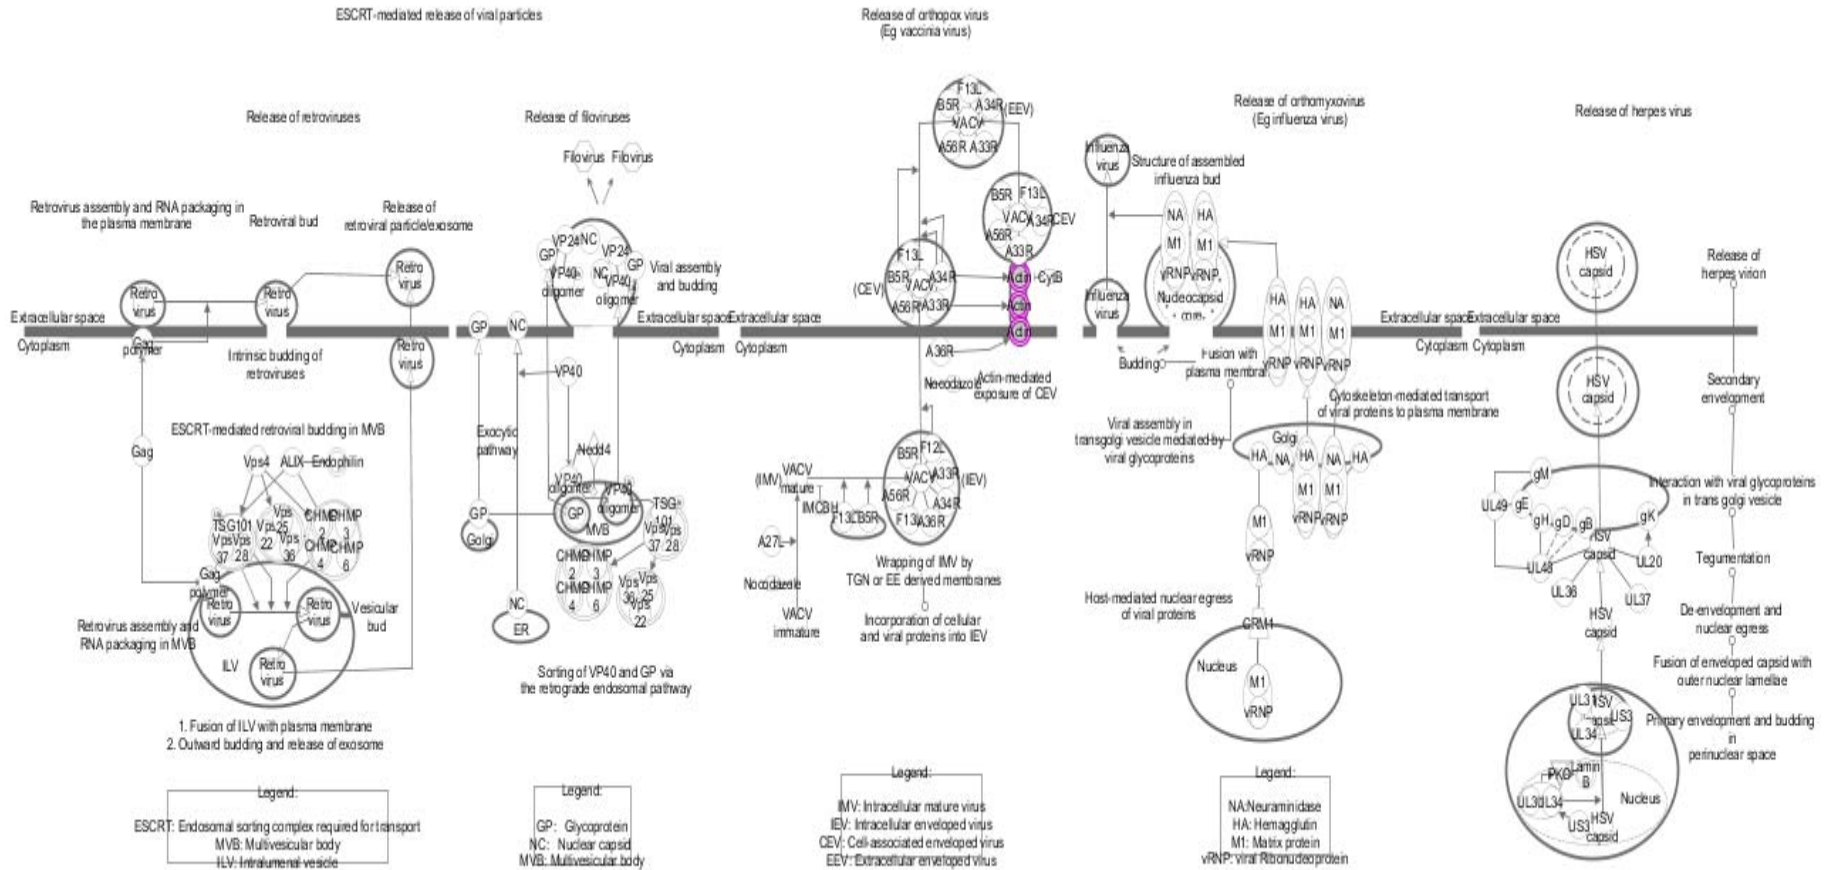

## 20. Mitotic roles of Polo-like kinase

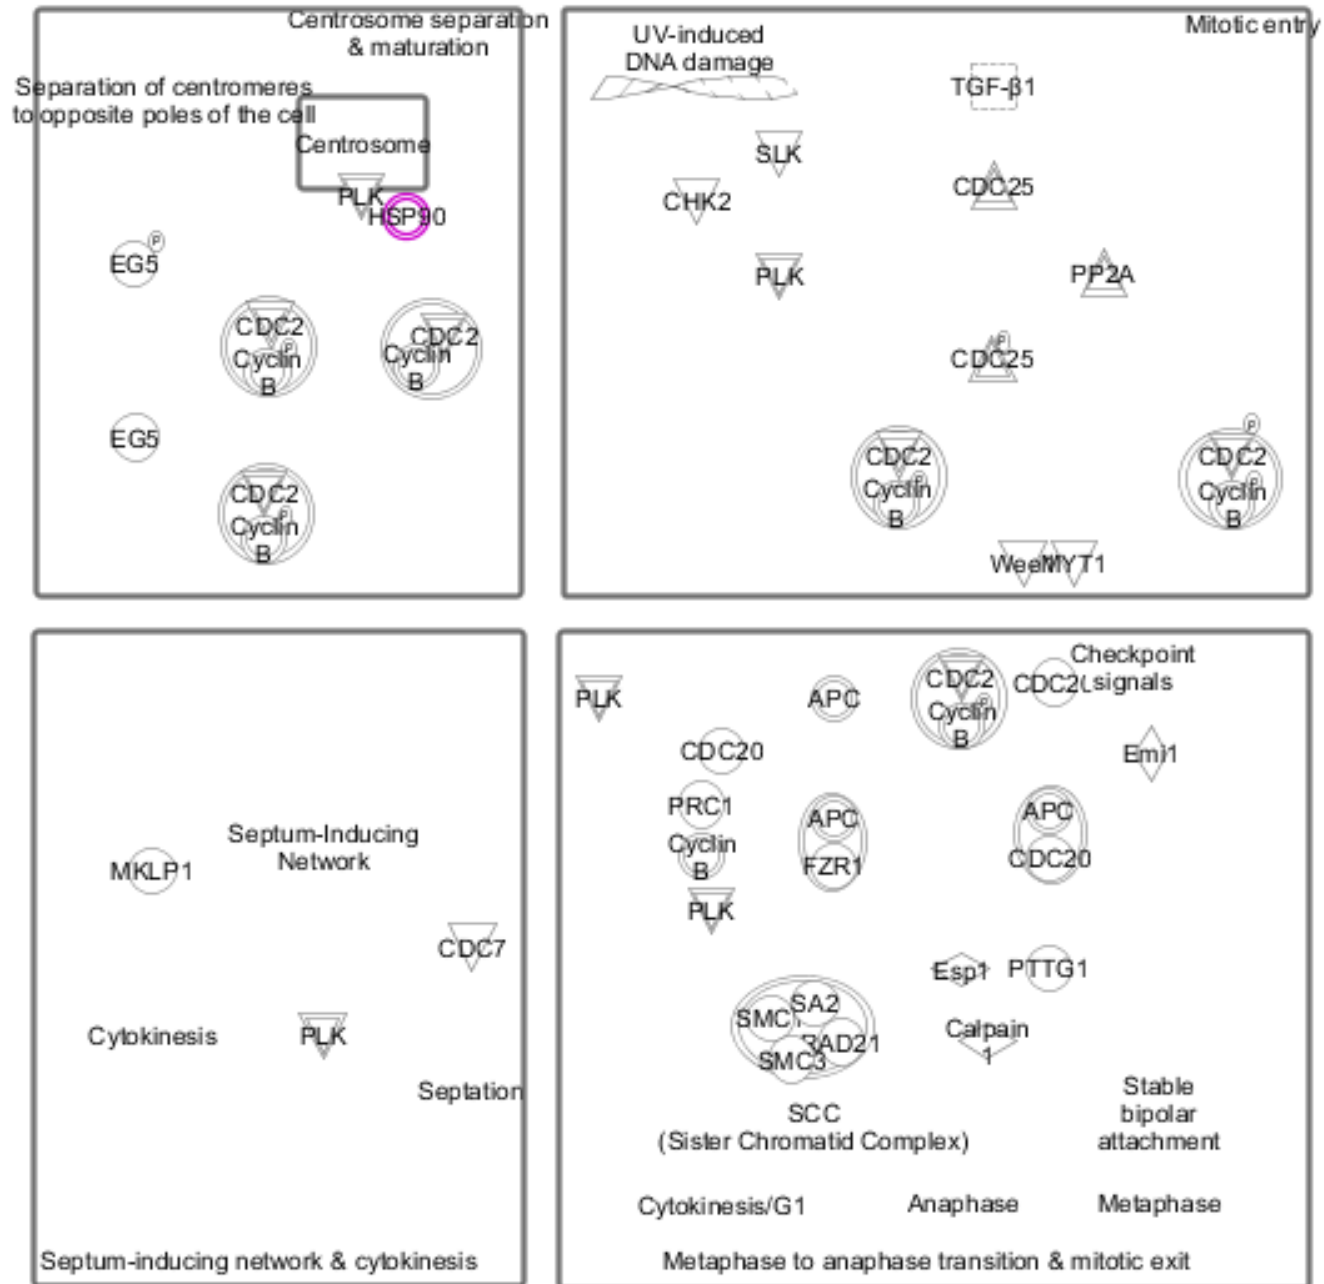

# 21. MSP-RON signaling pathway

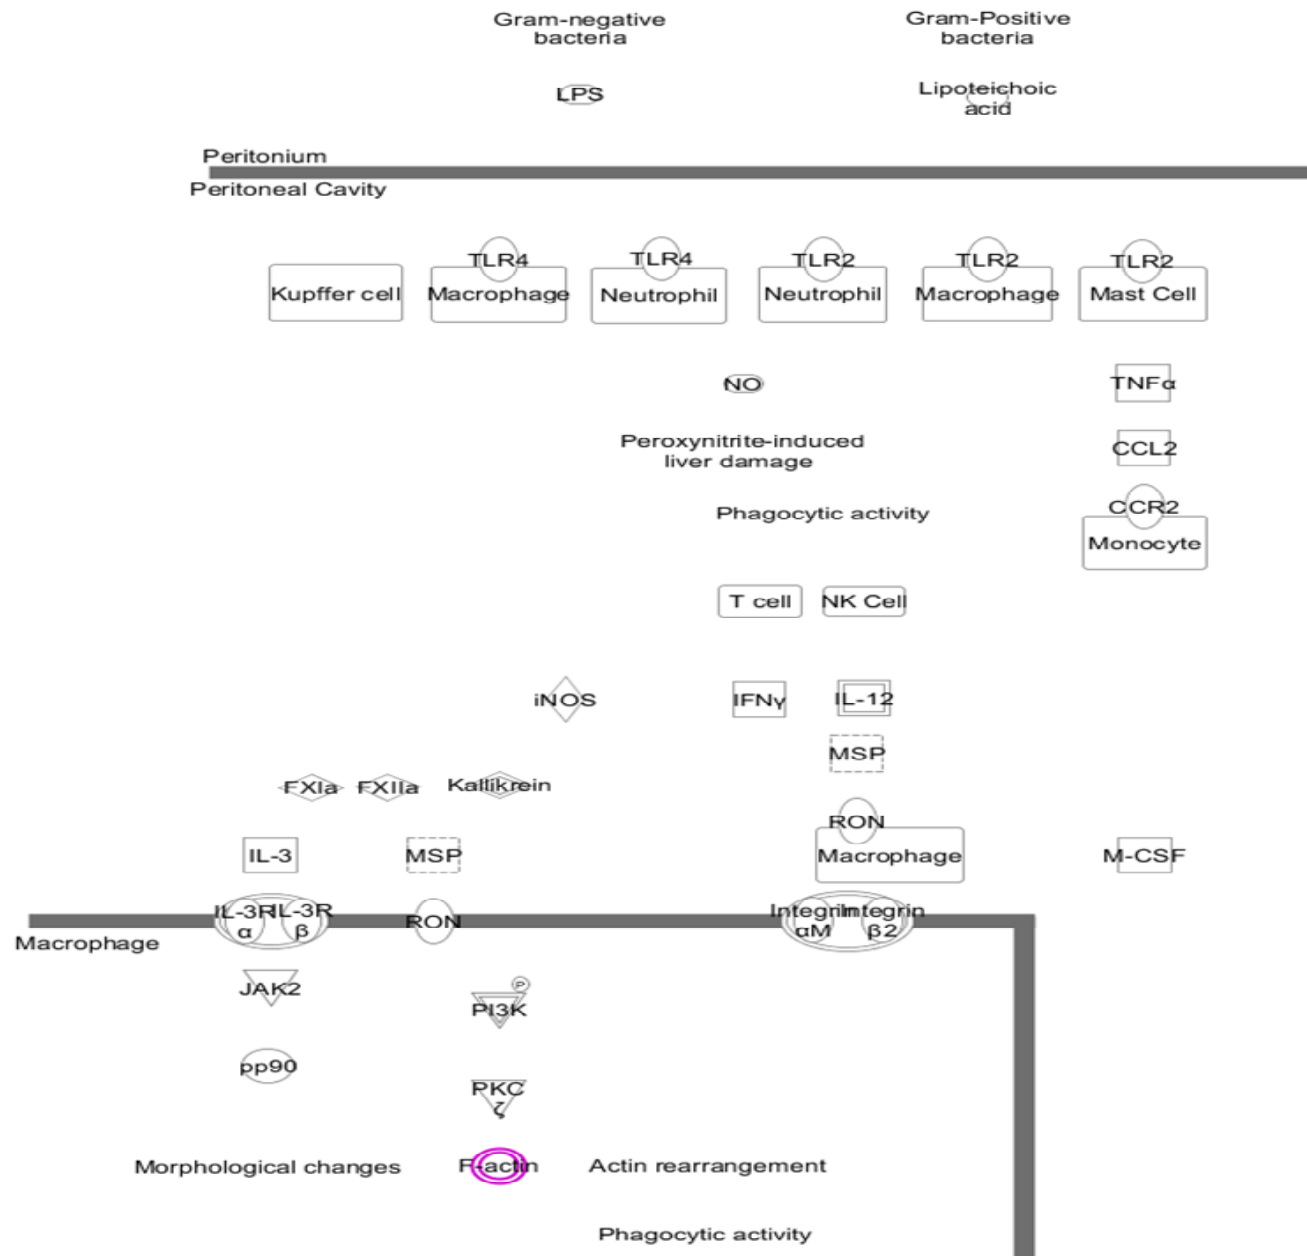



# 23. Neuroprotective role of THOP1 in Alzheimer's Disease

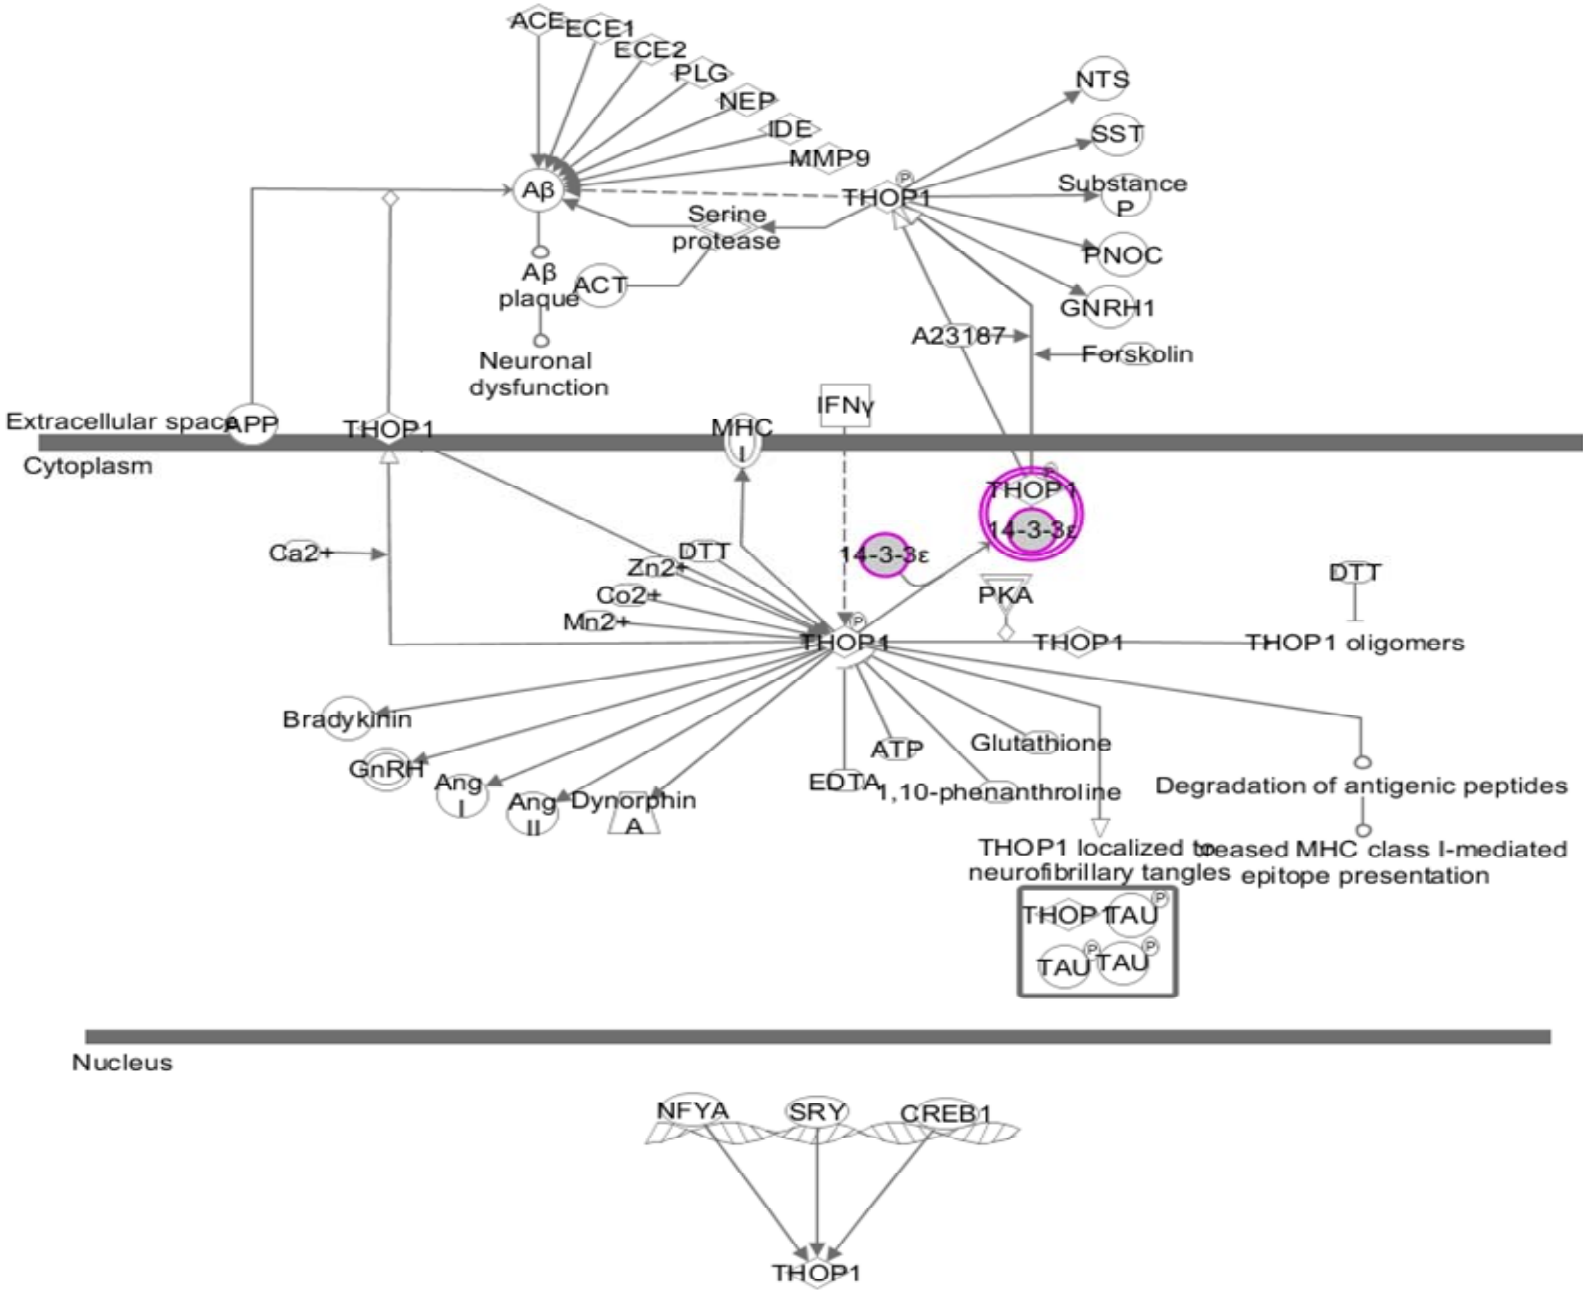

## 24. Nitric oxide signaling in the cardiovascular system

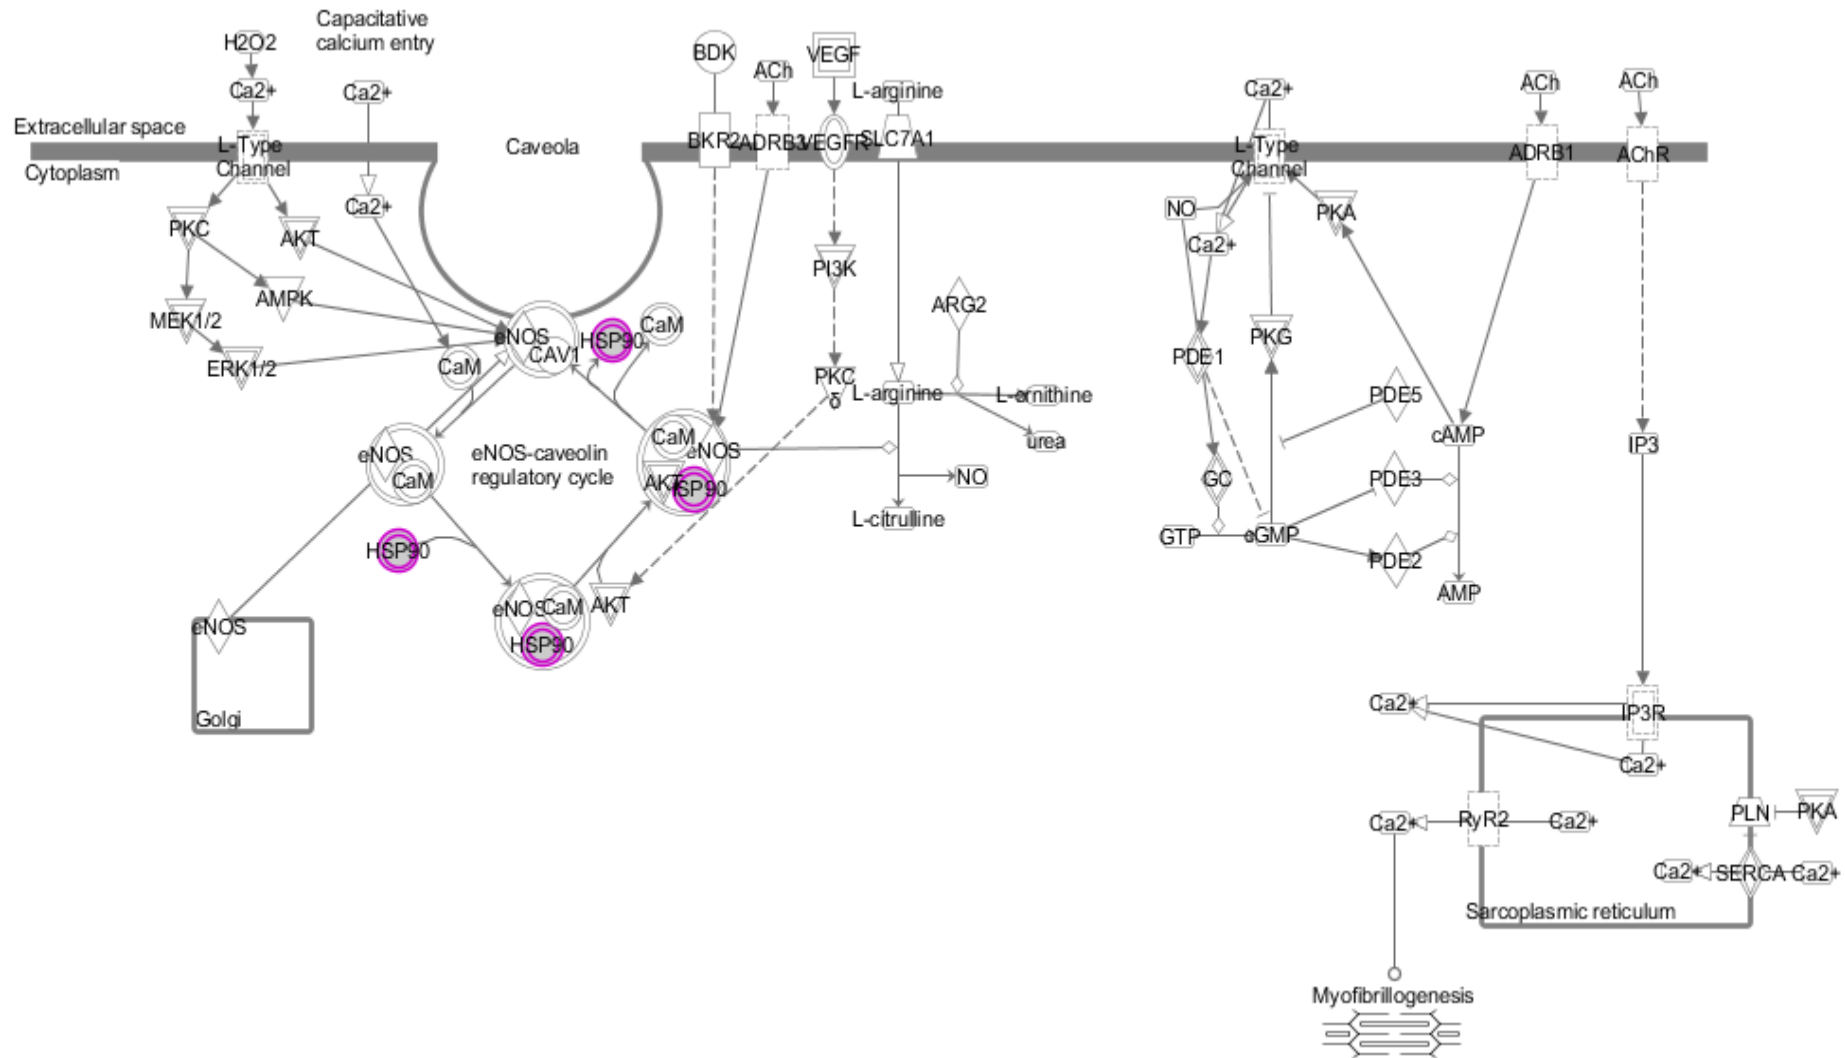



## 25. PI3K-AKT signaling

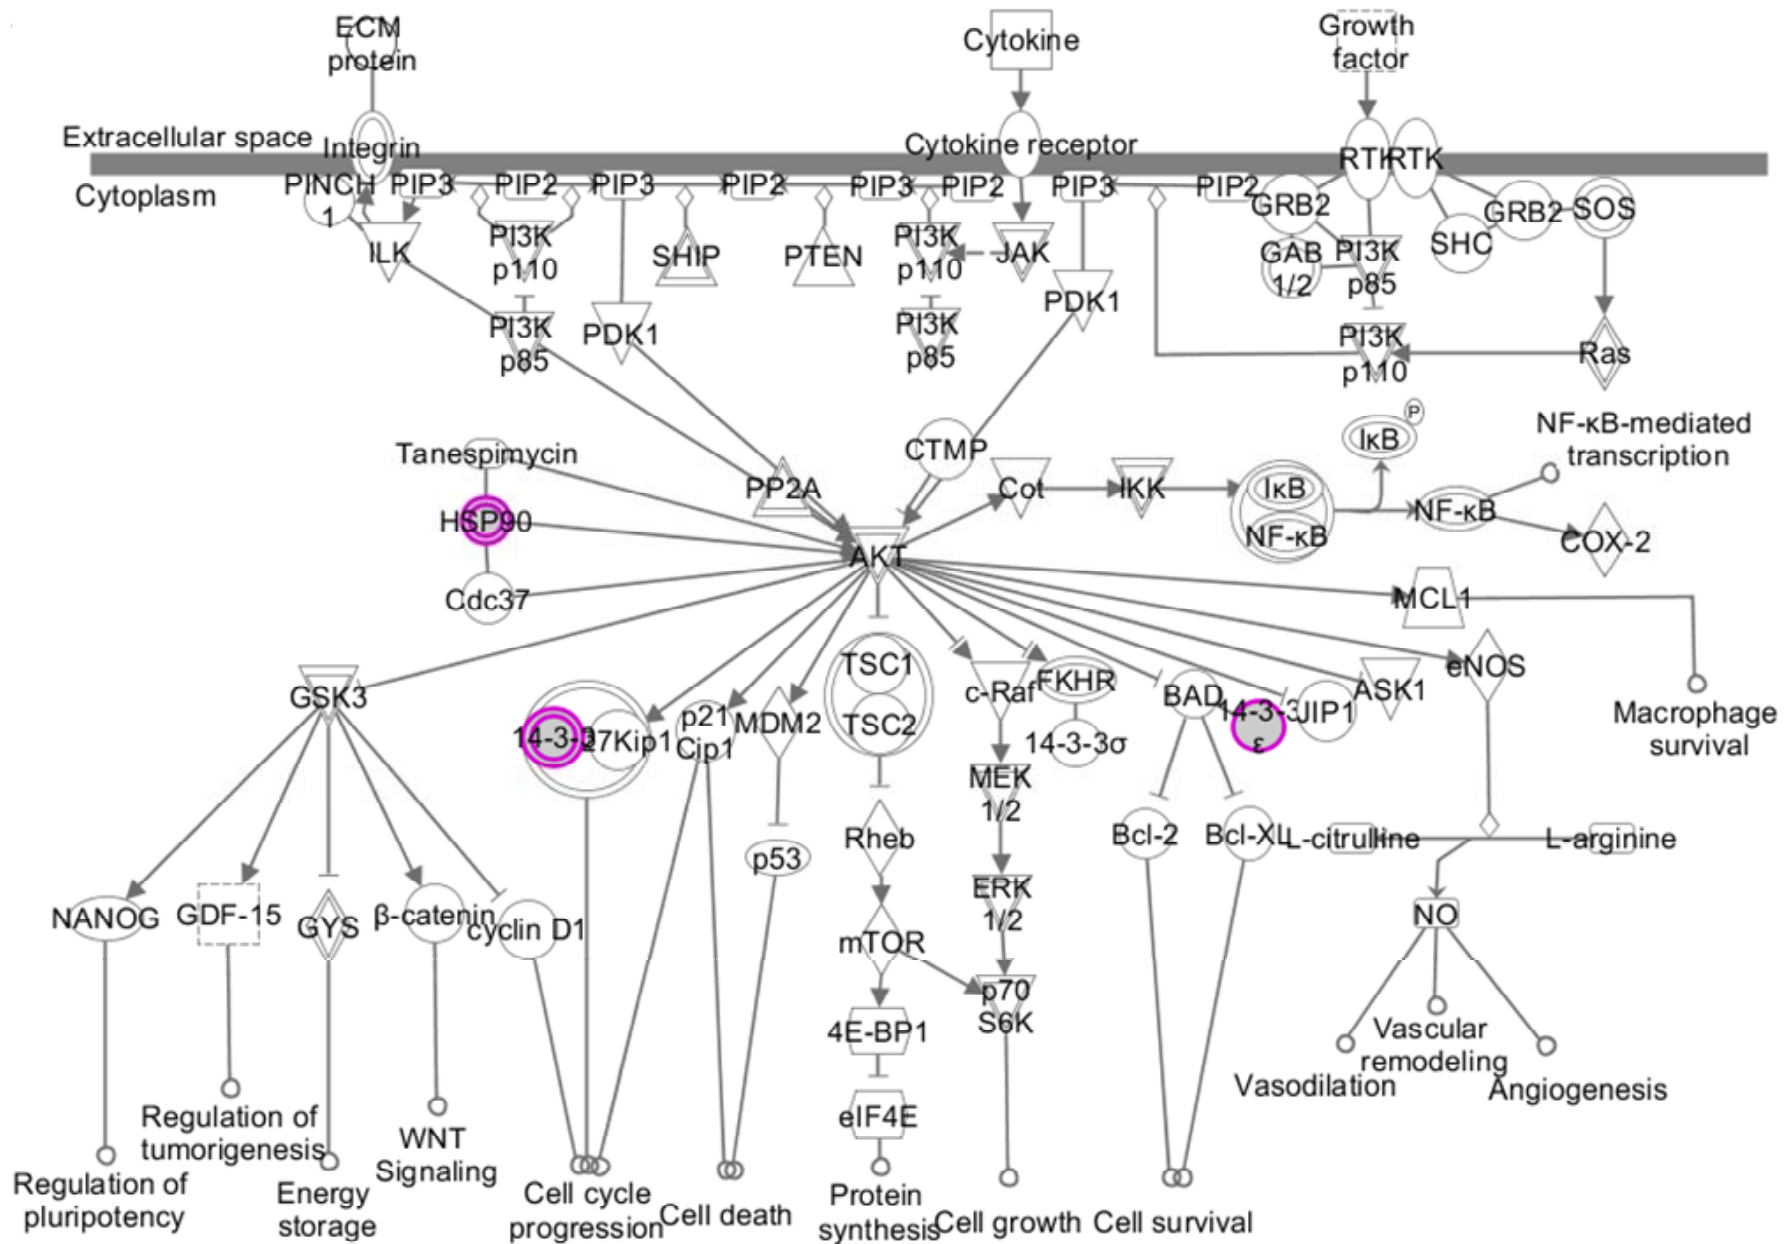

## 26. PPAR signaling

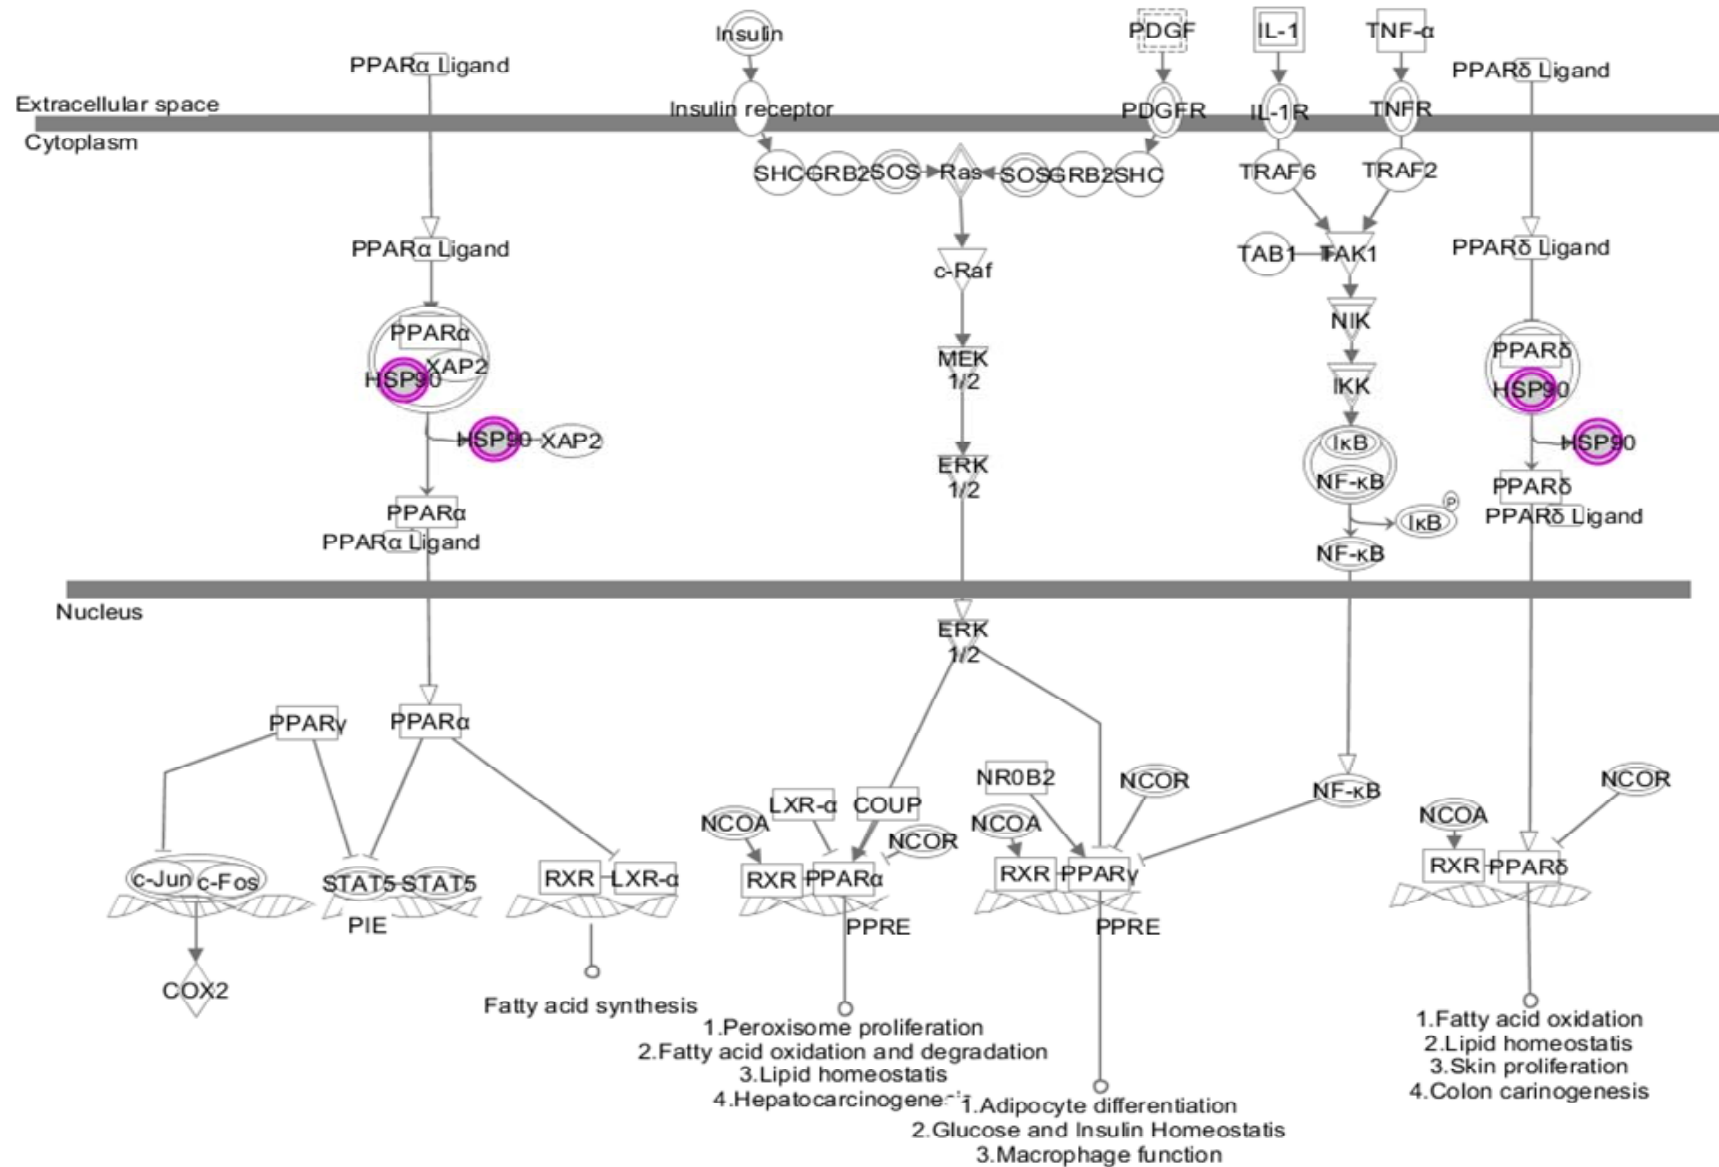

# 27. PPARα-RXRα activation

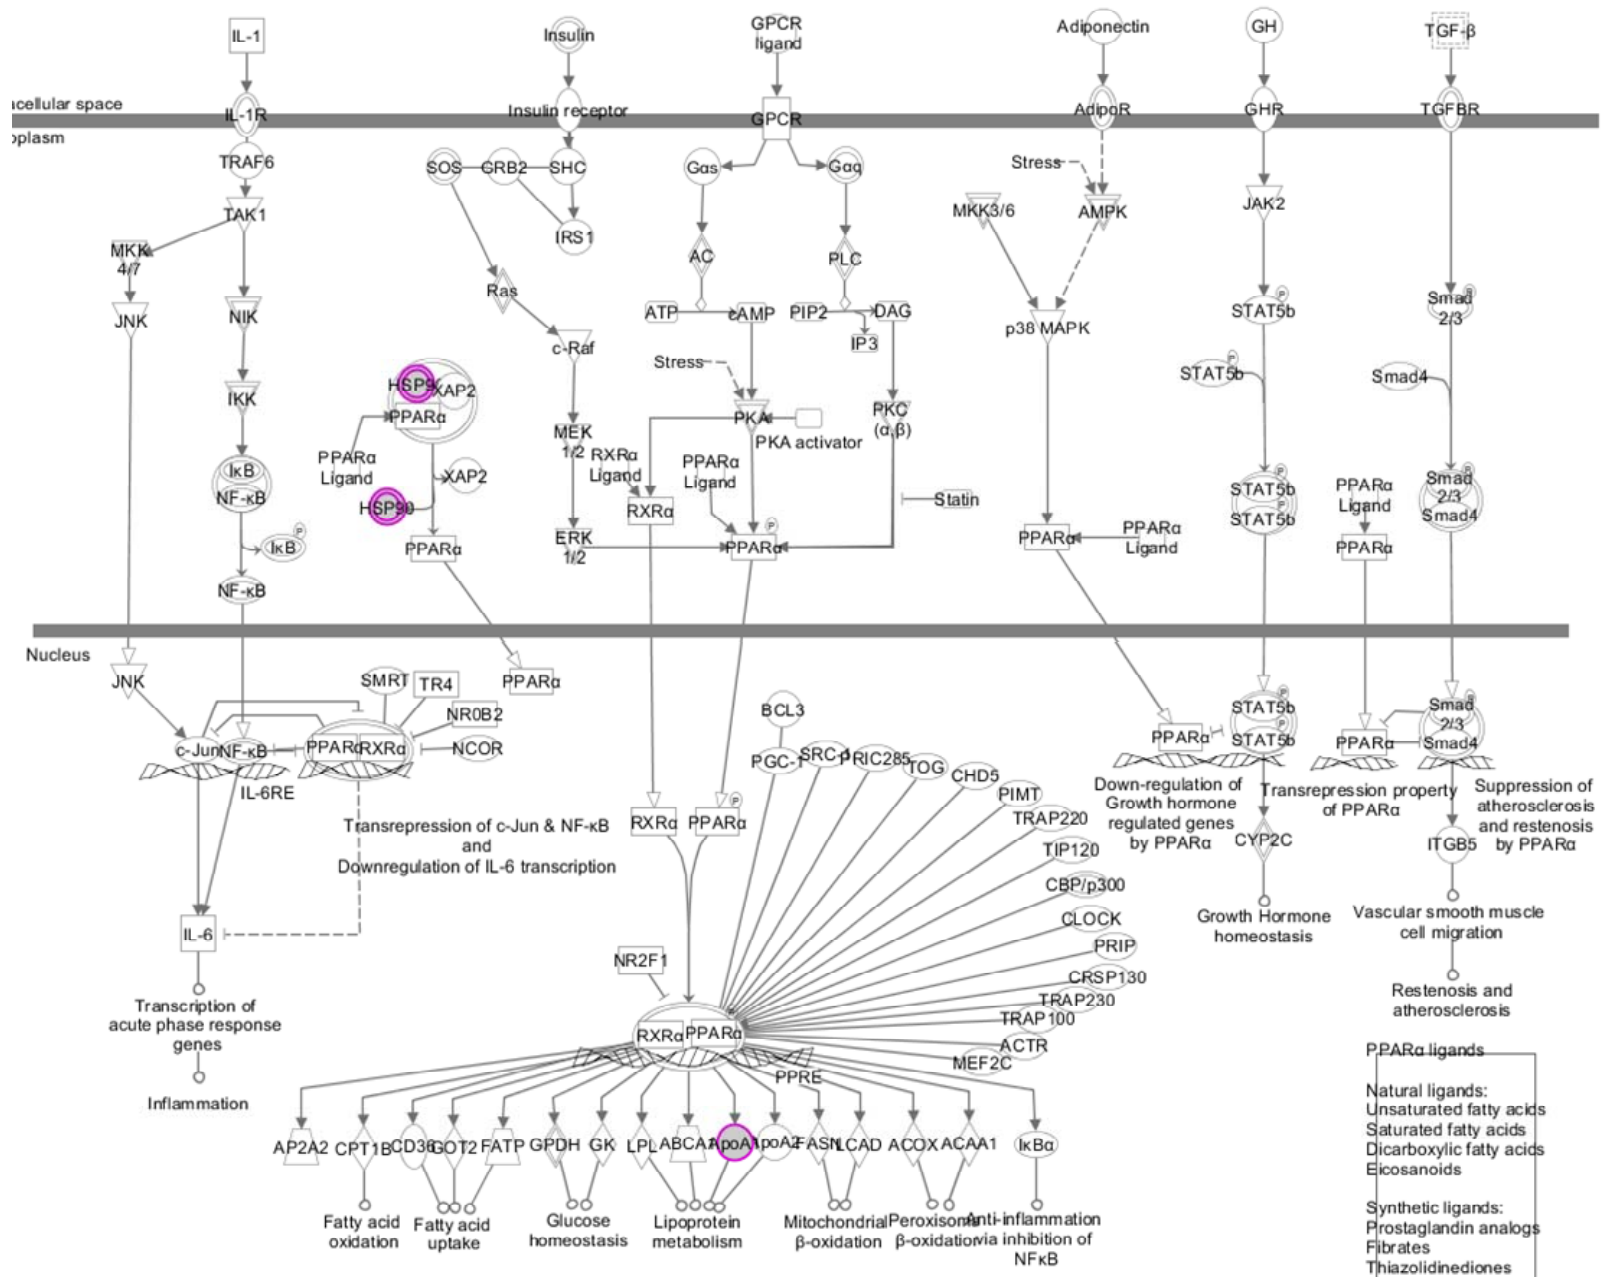

# 28. Prostate cancer signaling

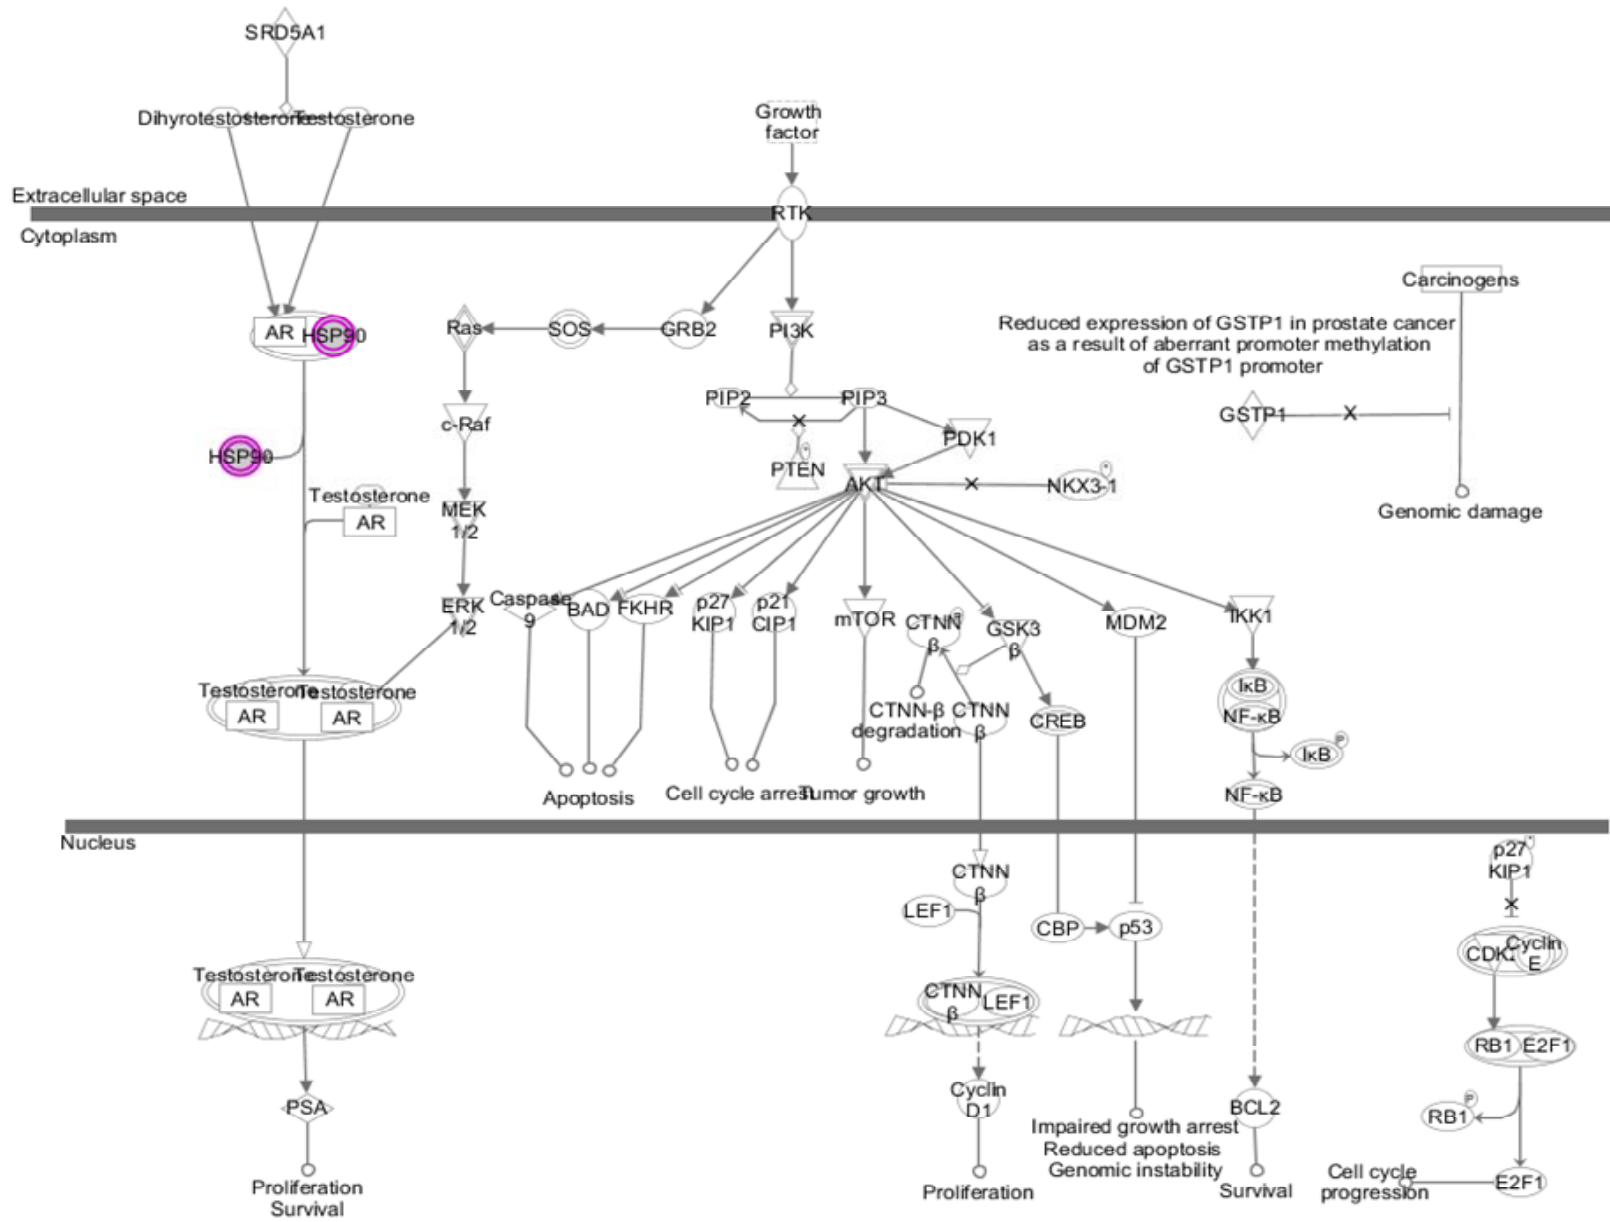

# 29. Protein ubiquitination pathway

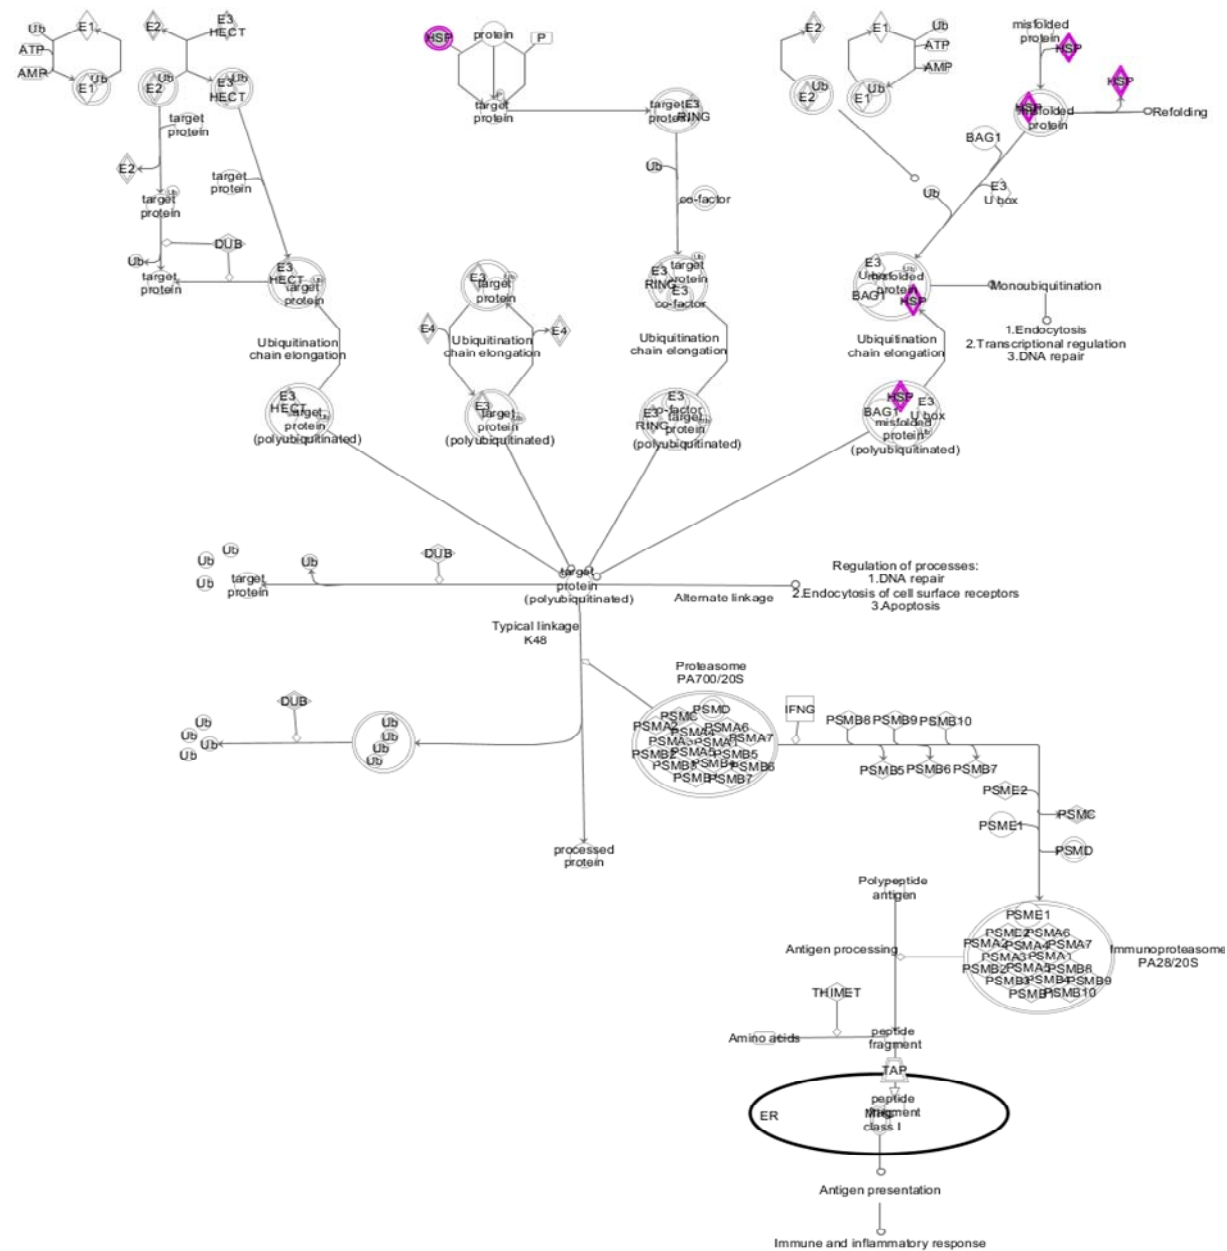

### 30. Pyruvate fermentation to lactate

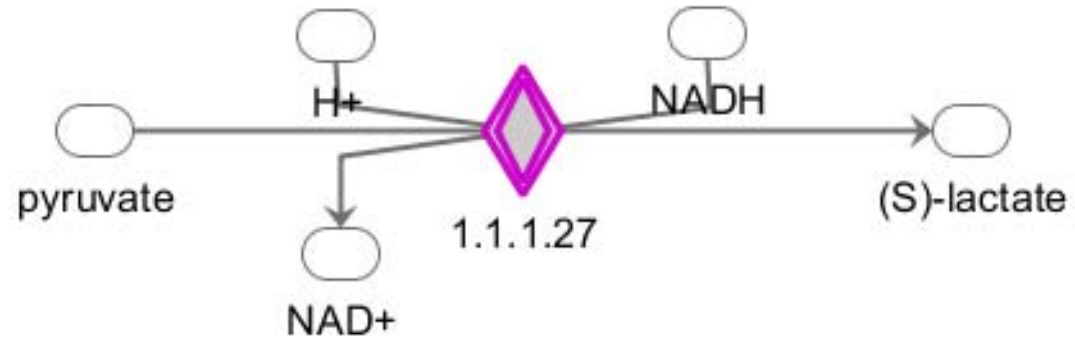

# 31. Remodeling of epithelial adherens junctions

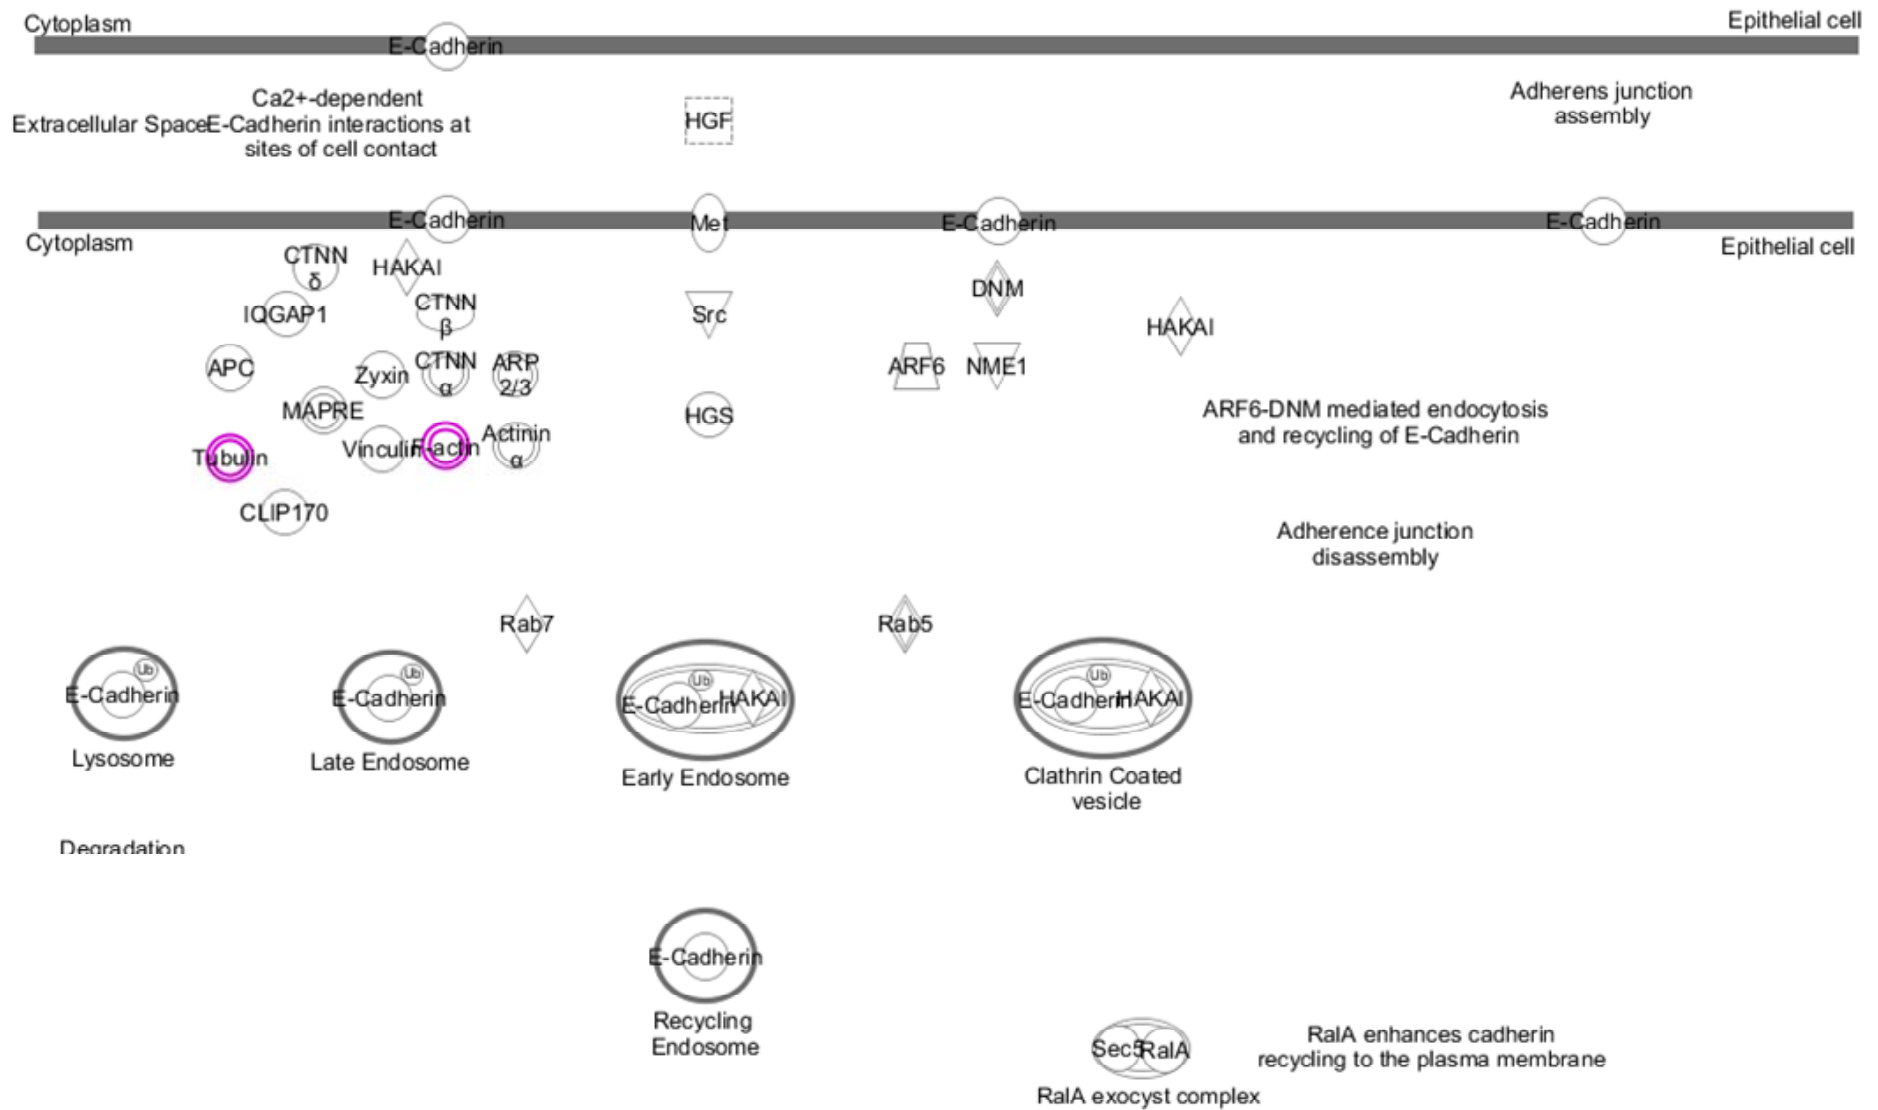

## 32. Sertoli cell-sertoli cell junction signaling

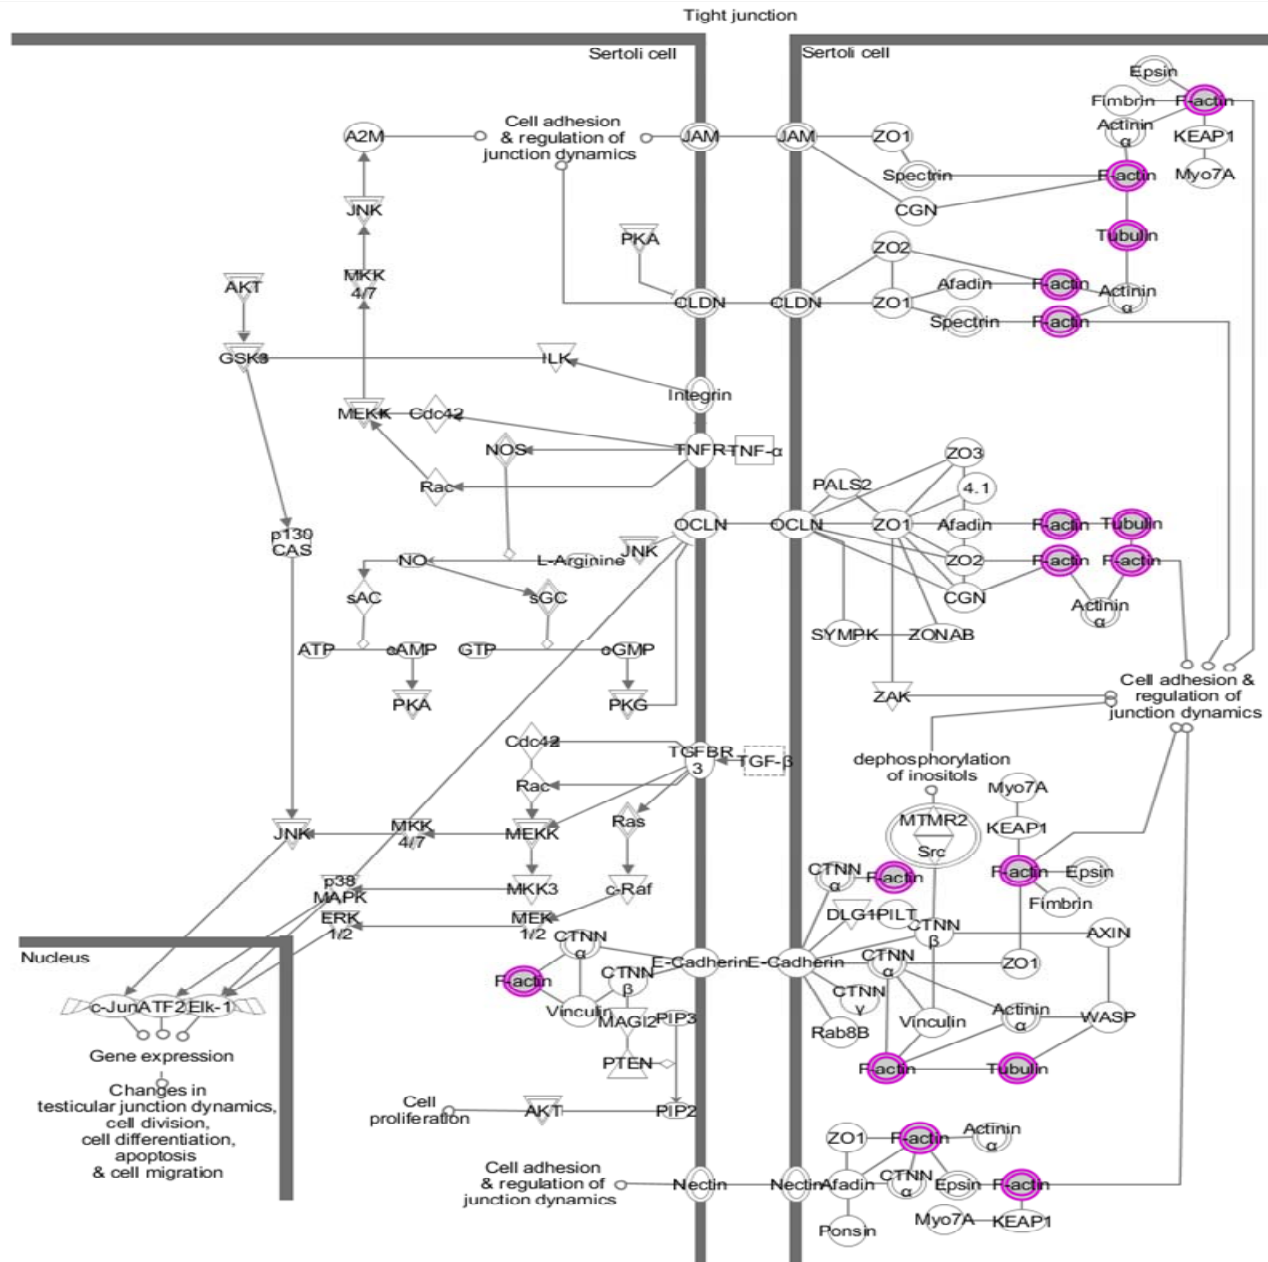



### 33. Signaling by Rho family GTPases

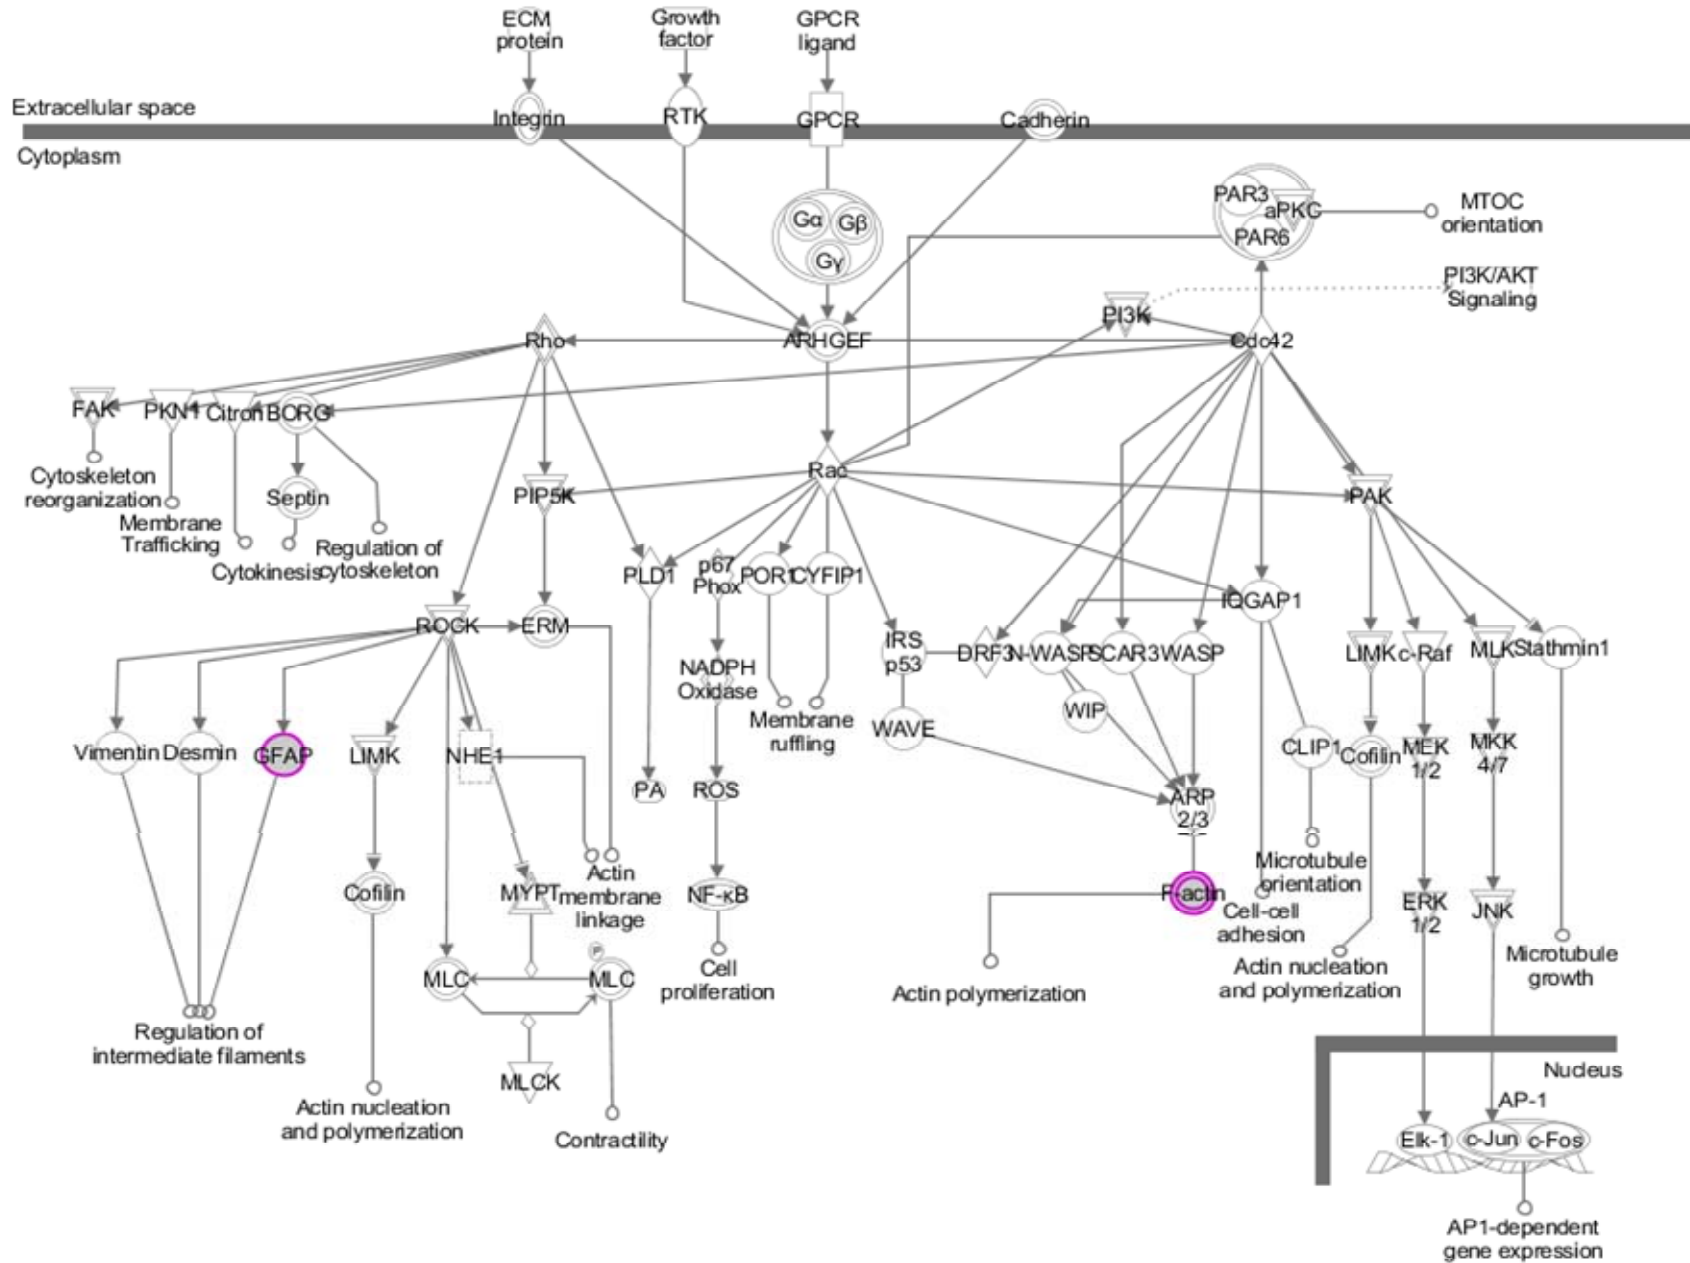

# 34. Telomerase signaling

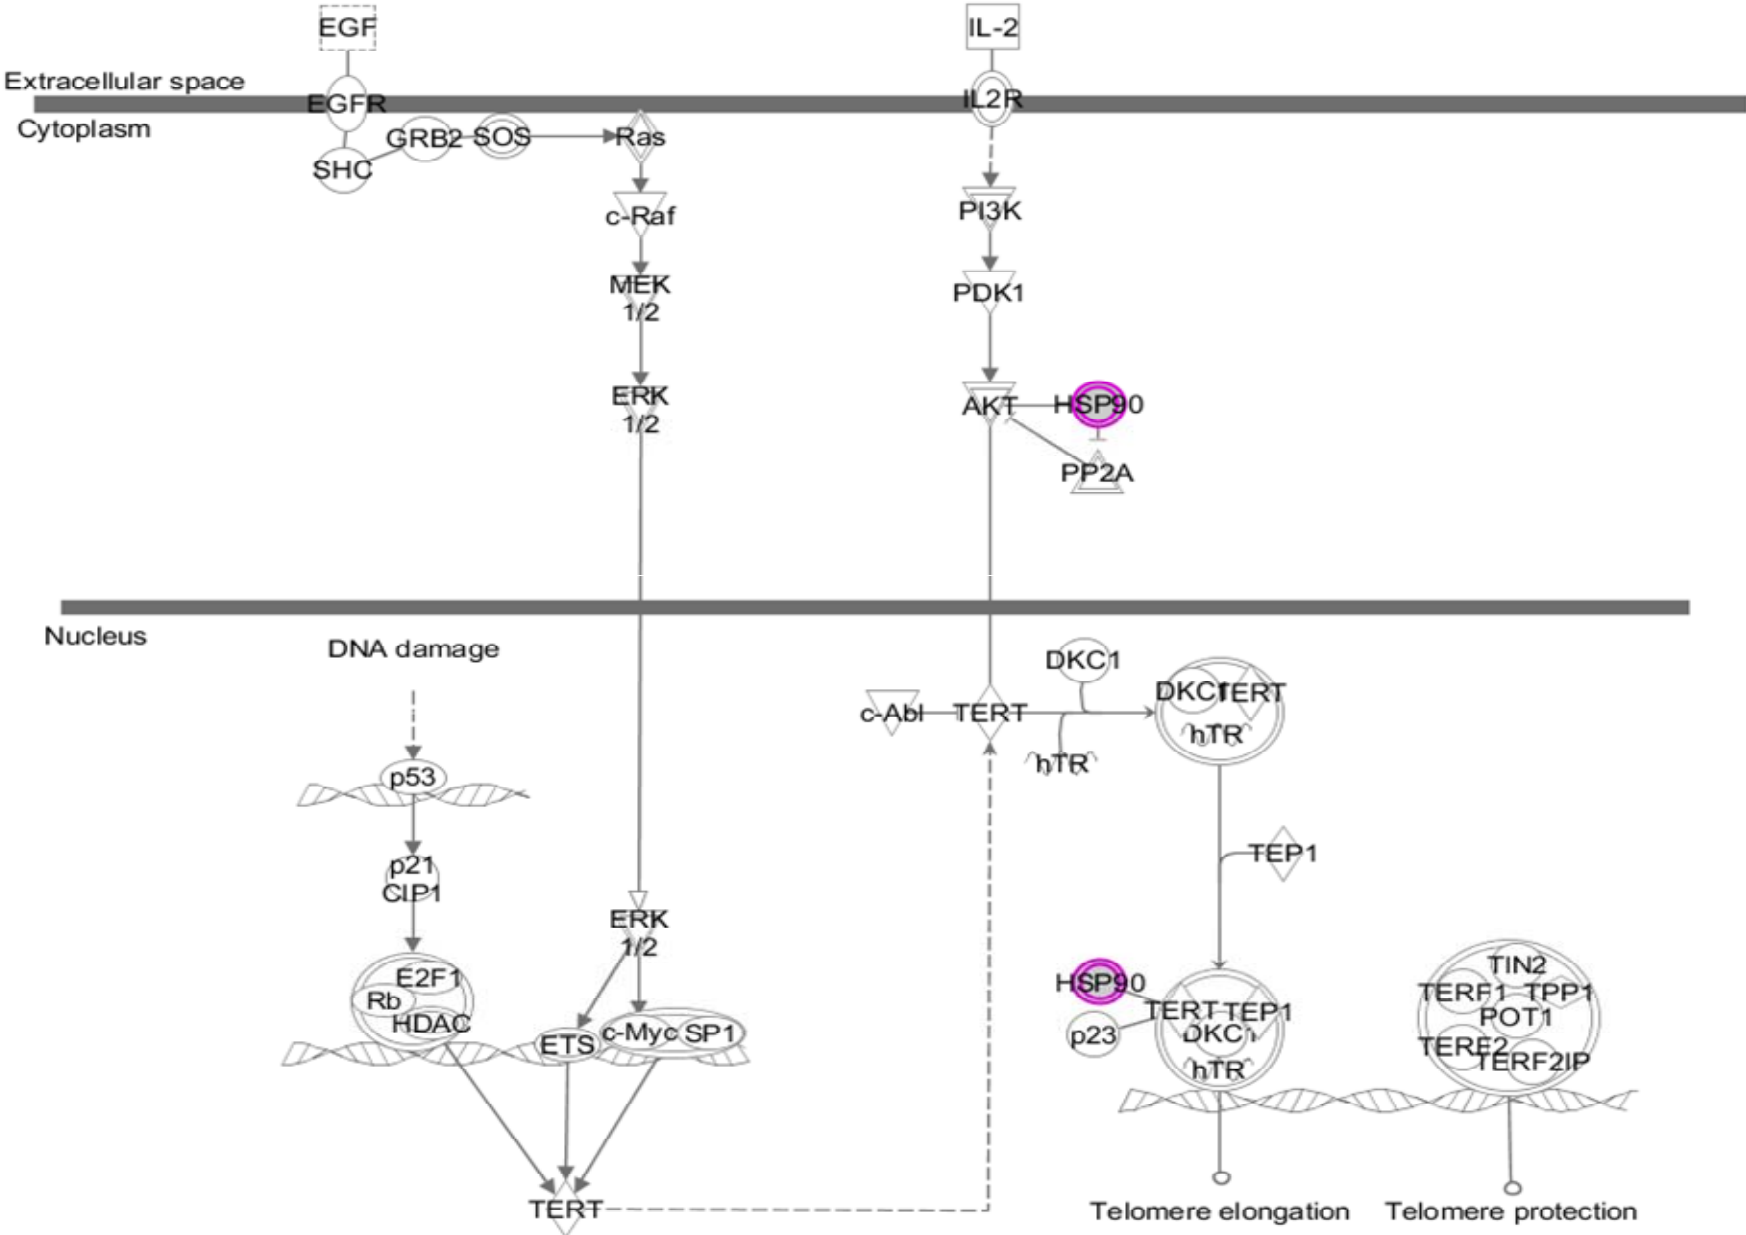

# 35. VEGF signaling

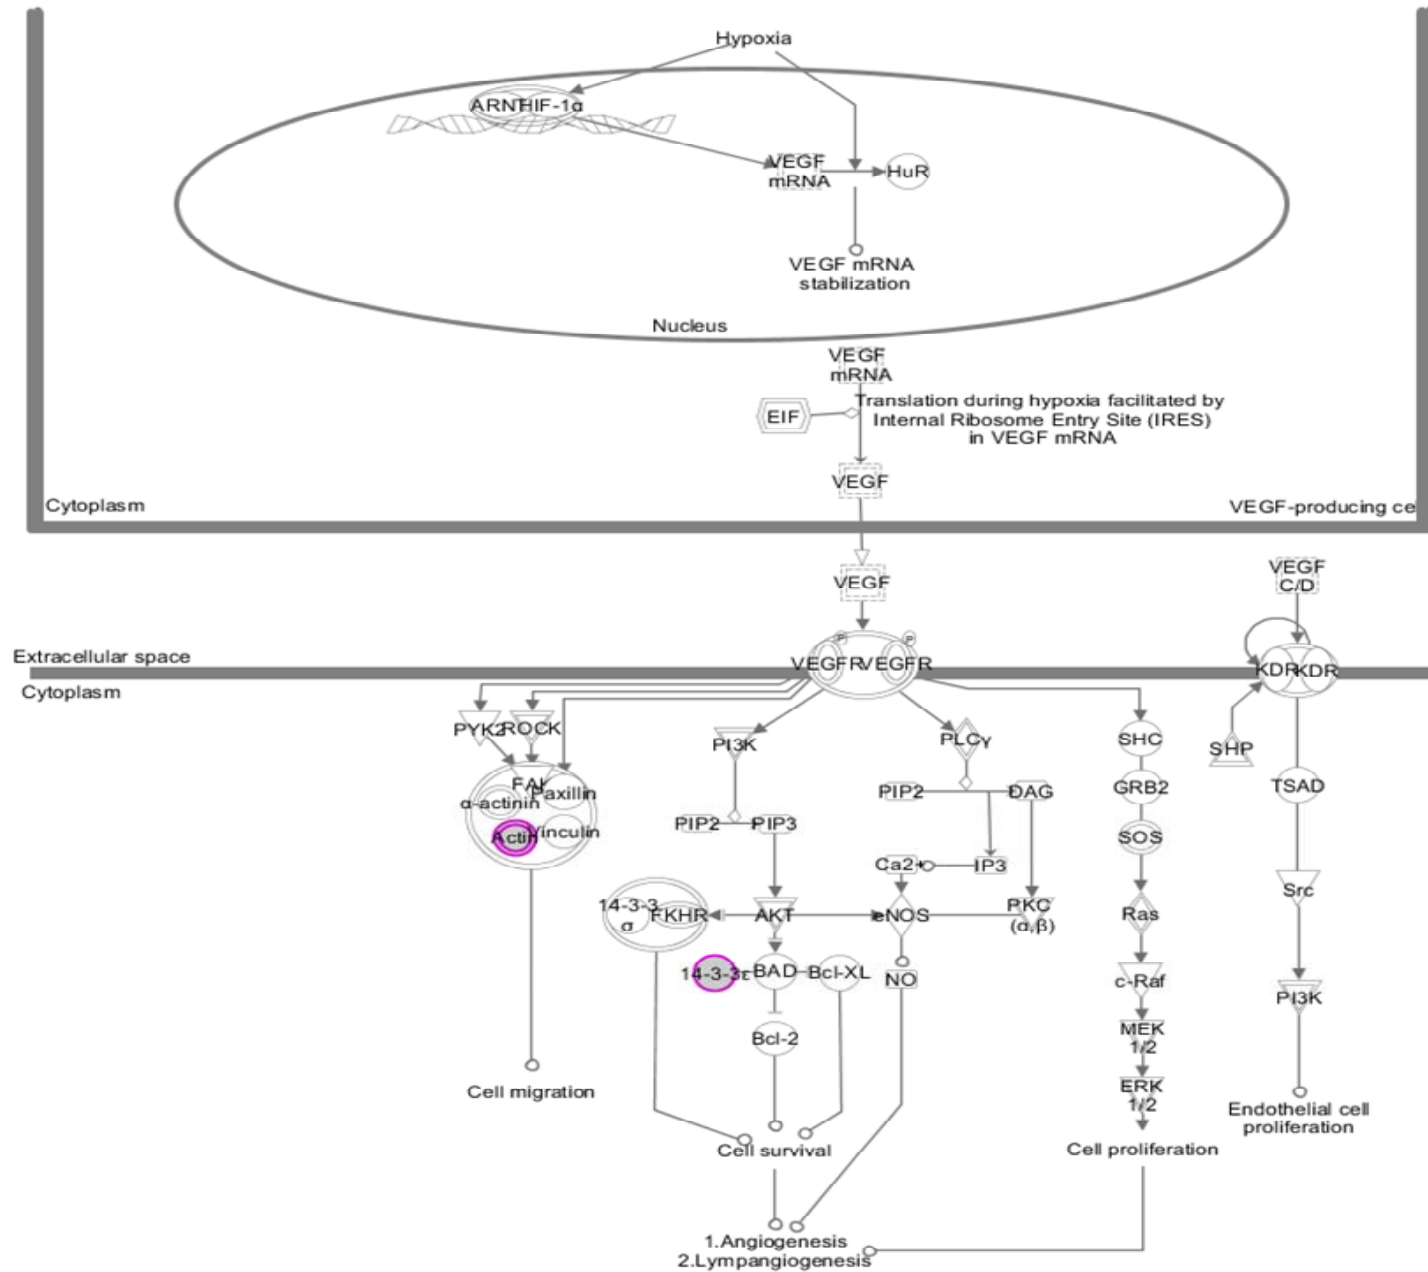

# 36. Xenobiotic metabolism signaling

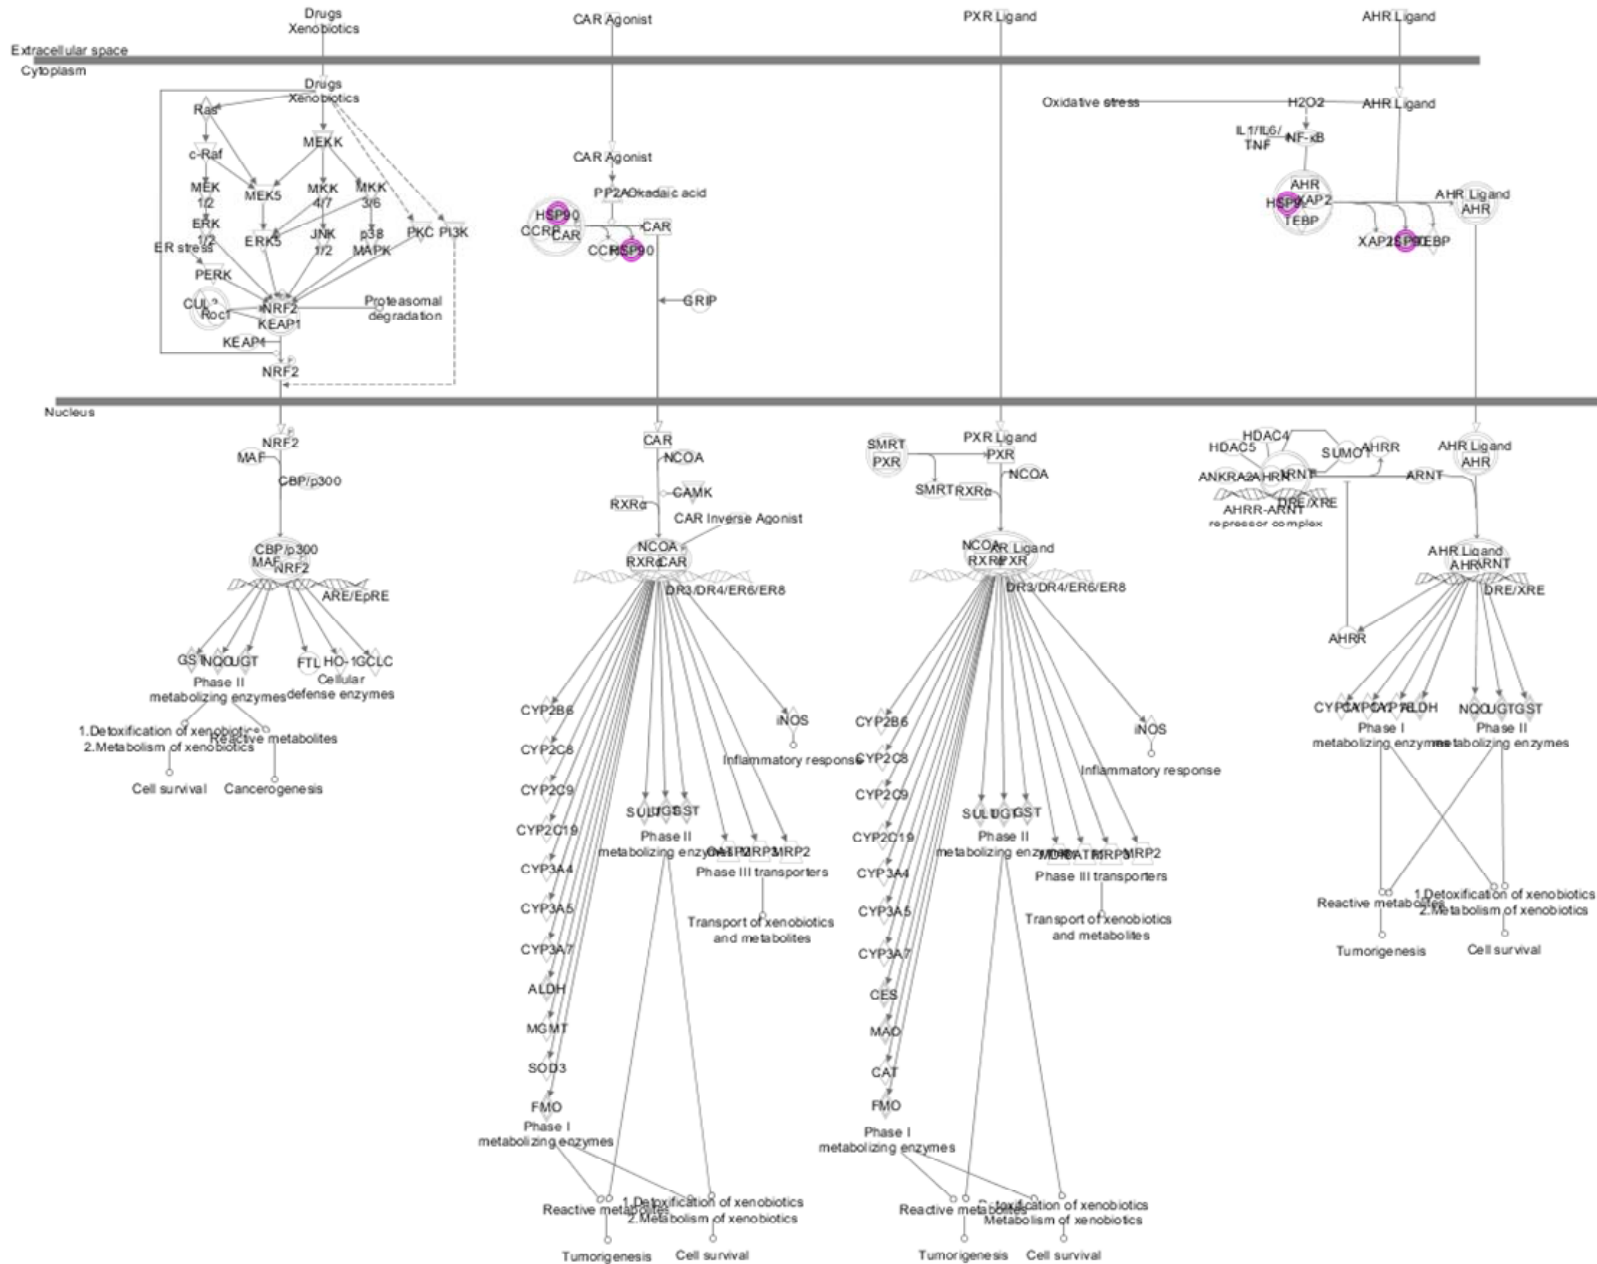

Supplement: 134050.f1.pdf [file 134050.f1.pdf]
